# Supplementary material for: Terminal {Ni(ii)-SH} complex promoted anaerobic catalytic sulfur atom transfer reaction: implication to the sulfide oxidase function of Cu/Zn-superoxide dismutase
Source: Royal Society of Chemistry journal article supplement (doi:10.1039/d4dt01364f), 2024-01-01
Supplement: d4dt01364f1.pdf [file d4dt01364f1.pdf]

Supporting Information  
For

Terminal {Ni(II)-SH} Complex Promoted Anaerobic Catalytic Sulfur Atom Transfer Reaction:  
Implication to sulfide oxidase function of Cu/Zn-Superoxide Dismutase

Jayanta Bag, Surajit Das and Kuntal Pal\*

Department of Chemistry, University of Calcutta, 92 APC Road, Kolkata 700 009, India

Contents

|                                                                                                                                                                           |    |
|---------------------------------------------------------------------------------------------------------------------------------------------------------------------------|----|
| Figure S1: $^1\text{H}$ NMR spectrum (400 MHz, DMSO- $d_6$ ) of $\text{H}_2\text{L}^{\text{tBu}}$ .....                                                                   | 3  |
| Figure S2: $^{13}\text{C}$ NMR spectrum (400 MHz, DMSO- $d_6$ ) of $\text{H}_2\text{L}^{\text{tBu}}$ .....                                                                | 3  |
| Figure S3A: $^1\text{H}$ NMR spectrum (400 MHz, DMSO- $d_6$ ) of $[(\text{NiL}^{\text{tBu}})_2] (1^{\text{tBu}})$ .....                                                   | 4  |
| Figure S3B: $^1\text{H}$ NMR spectrum (400 MHz, $\text{CDCl}_3$ ) of $1^{\text{tBu}}$ .....                                                                               | 4  |
| Figure S4: $^{13}\text{C}$ NMR spectrum (400 MHz, DMSO- $d_6$ ) of $[(\text{NiL}^{\text{tBu}})_2] (1^{\text{tBu}})$ .....                                                 | 5  |
| Figure S5: $^1\text{H}$ NMR spectrum (400 MHz, $\text{CDCl}_3$ ) of $[\text{NiL}^{\text{tBu}}(\text{PPh}_3)] (2^{\text{tBu}})$ .....                                      | 5  |
| Figure S6: $^{13}\text{C}$ NMR spectrum (400 MHz, $\text{CDCl}_3$ ) of $[\text{NiL}^{\text{tBu}}(\text{PPh}_3)] (2^{\text{tBu}})$ .....                                   | 6  |
| Figure S7: $^1\text{H}$ NMR spectrum (400 MHz, $\text{CDCl}_3$ ) of $[\text{NiL}^{\text{OMe}}(\text{SH})] (3^{\text{OMe}}. (\text{Et}_4\text{N}))$ .....                  | 6  |
| Figure S9: $^{31}\text{P}\{^1\text{H}\}$ NMR spectrum (400 MHz, $\text{CDCl}_3$ ) of $[\text{NiL}^{\text{OMe}}(\text{PPh}_3)] (3^{\text{OMe}})$ .....                     | 7  |
| Figure S10: $^1\text{H}$ NMR spectrum (400 MHz, $\text{CDCl}_3$ ) of $[\text{NiL}^{\text{tBu}}(\text{SH})](3^{\text{tBu}}. (\text{Et}_4\text{N}))$ .....                  | 7  |
| Figure S11: $^{13}\text{C}$ NMR spectrum (400 MHz, $\text{CDCl}_3$ ) of $[\text{NiL}^{\text{tBu}}(\text{SH})](3^{\text{tBu}}. (\text{Et}_4\text{N}))$ .....               | 8  |
| Figure S12: $^{31}\text{P}\{^1\text{H}\}$ NMR spectrum (400 MHz, $\text{CDCl}_3$ ) of $[\text{NiL}^{\text{tBu}}(\text{PPh}_3)] (2^{\text{tBu}})$ .....                    | 8  |
| Figure S13: LC-MS mass spectrum of $\text{H}_2\text{L}^{\text{tBu}}$ .....                                                                                                | 9  |
| Figure S14: HRMS (ESI $^+$ ) spectrum of $[(\text{NiL}^{\text{tBu}})_2] (1^{\text{tBu}})$ .....                                                                           | 10 |
| Figure S15: HRMS (ESI $^+$ ) spectrum of $[\text{NiL}^{\text{tBu}}(\text{PPh}_3)] (2^{\text{tBu}})$ .....                                                                 | 10 |
| Figure S16: LCMS (ESI $^-$ ) spectrum of $[\text{NiL}^{\text{OMe}}(\text{SH})] (3^{\text{OMe}}. (\text{Et}_4\text{N}))$ .....                                             | 11 |
| Figure S17: LC-MS (ESI $^-$ ) spectrum of $[\text{NiL}^{\text{tBu}}(\text{SH})] (3^{\text{tBu}}. (\text{Et}_4\text{N}))$ .....                                            | 12 |
| Figure S18: UV-vis spectra of $\text{H}_2\text{L}^{\text{tBu}}(5 \times 10^{-5}(\text{M}))$ in acetonitrile at 25 °C) .....                                               | 12 |
| Figure S19: UV-vis spectra of $[(\text{NiL}^{\text{tBu}})_2] (1^{\text{tBu}}) (5 \times 10^{-5}(\text{M}))$ in acetonitrile at 25 °C) .....                               | 13 |
| Figure S20: UV-vis spectra of $[\text{NiL}^{\text{tBu}}(\text{PPh}_3)] (2^{\text{tBu}}) (5 \times 10^{-5}(\text{M}))$ in acetonitrile at 25 °C) .....                     | 13 |
| Figure S21: UV-vis spectra of $[\text{NiL}^{\text{OMe}}(\text{SH})] (3^{\text{OMe}}. (\text{Et}_4\text{N})) (5 \times 10^{-5}(\text{M}))$ in acetonitrile at 25 °C) ..... | 14 |
| Figure S22: UV-vis spectra of $[\text{NiL}^{\text{tBu}}(\text{SH})] (3^{\text{tBu}}. (\text{Et}_4\text{N})) (5 \times 10^{-5}(\text{M}))$ in acetonitrile at 25 °C) ..... | 14 |
| Figure S23: FT-IR (KBr Pellet) spectra of $\text{H}_2\text{L}^{\text{tBu}}$ .....                                                                                         | 15 |
| Figure S24: FT-IR (KBr Pellet) spectra of $[(\text{NiL}^{\text{tBu}})_2] (1^{\text{tBu}})$ .....                                                                          | 15 |
| Figure S25: FT-IR (KBr Pellet) spectra of $[\text{NiL}^{\text{tBu}}(\text{PPh}_3)] (2^{\text{tBu}})$ .....                                                                | 16 |
| Figure S26: FT-IR (KBr Pellet) spectra of $[\text{NiL}^{\text{OMe}}(\text{SH})] (3^{\text{OMe}}. (\text{Et}_4\text{N}))$ .....                                            | 16 |
| Figure S27: FT-IR (KBr Pellet) spectra of $[\text{NiL}^{\text{tBu}}(\text{SH})] (3^{\text{tBu}}. (\text{Et}_4\text{N}))$ .....                                            | 17 |

|                                                                                                                                                                                                                                                                        |    |
|------------------------------------------------------------------------------------------------------------------------------------------------------------------------------------------------------------------------------------------------------------------------|----|
| Figure S28: Cyclic voltammogram of $H_2L^{OMe}$ in DMF (scan speed: 100 mV/s, 0.1 M $nBu_4N(ClO_4)$ supporting electrolyte, glassy carbon working electrode, Pt-wire counter electrode, Ag/AgCl reference electrode, RT, Arrow indicates direction of the scan). ..... | 17 |
| Figure S29: Cyclic voltammogram of $H_2L^{tBu}$ in DMF (scan speed: 100 mV/s, 0.1 M $nBu_4N(ClO_4)$ supporting electrolyte, glassy carbon working electrode, Pt-wire counter electrode, Ag/AgCl reference electrode, RT, Arrow indicates direction of the scan). ..... | 18 |
| Figure S30: Cyclic voltammogram of $NEt_4SH$ in DMF (scan speed: 100 mV/s, 0.1 M $nBu_4N(ClO_4)$ supporting electrolyte, glassy carbon working electrode, Pt-wire counter electrode, Ag/AgCl reference electrode, RT, Arrow indicates direction of the scan). .....    | 18 |
| Figure S31: Reaction of $[NiL^{OMe}(PPh_3)]$ with $Et_4NSH$ (1:2.2 ratio) in $CDCl_3$ at $70^\circ C$ . .....                                                                                                                                                          | 19 |
| Figure S32. $^{31}P\{^1H\}$ NMR spectral changes with time for the reaction of $2^{tBu}$ and $Et_4NSH$ using 1:1 mol ratio at RT in $CDCl_3$ . .....                                                                                                                   | 19 |
| Figure S33. $^{31}P\{^1H\}$ NMR spectral changes with time in $CDCl_3$ for the reaction of $2^{tBu}$ and $Et_4NSH$ using 1:2 mol ratio at RT. ....                                                                                                                     | 20 |
| Figure S34: $^{31}P\{^1H\}$ NMR spectral changes with time for the reaction of $2^{tBu}$ with $Et_4NSH$ (1:2 ratio) in $CDCl_3$ at $70^\circ C$ . ....                                                                                                                 | 20 |
| Figure S35. $^{31}P\{^1H\}$ NMR spectral changes with time in $CDCl_3$ for the reaction of $PPh_3$ and $Et_4NSH$ in presence of 10 mol % of complex $2^{tBu}$ as catalyst at $70^\circ C$ in $CDCl_3$ . .....                                                          | 21 |
| Figure S36: Mass spectra of the reaction mixture of $2^{OMe}$ with $Et_4NSH$ (1:2 ratio) in acetonitrile. ...                                                                                                                                                          | 22 |
| Figure S37: Mass spectra of the reaction mixture of $2^{tBu}$ with $Et_4NSH$ (1:2 ratio) in acetonitrile. ...                                                                                                                                                          | 23 |
| <b>Crystallographic Data Parameters:</b> .....                                                                                                                                                                                                                         | 26 |
| Table S1. Crystallographic parameters for Synthesis of $[(NiL^{tBu})_2]$ ( $1^{tBu}$ ), $[NiL^{tBu}(PPh_3)]$ ( $2^{tBu}$ ), $[NiL^{OMe}(SH)]$ ( $3^{OMe}$ ), $(Et_4N)$ , $[NiL^{tBu}(SH)]$ ( $3^{tBu}$ ), $(Et_4N)$ .....                                              | 26 |

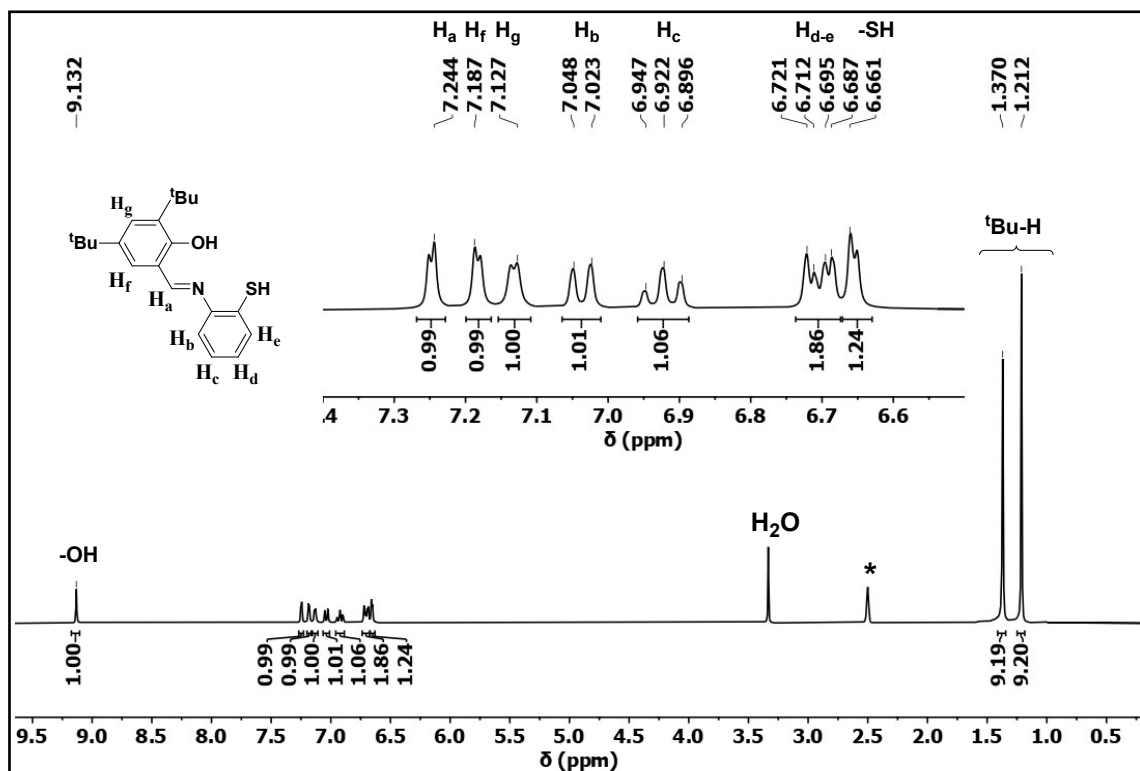

Figure S1:  $^1H$  NMR spectrum (400 MHz, DMSO- $d_6$ ) of  $H_2L^{tBu}$

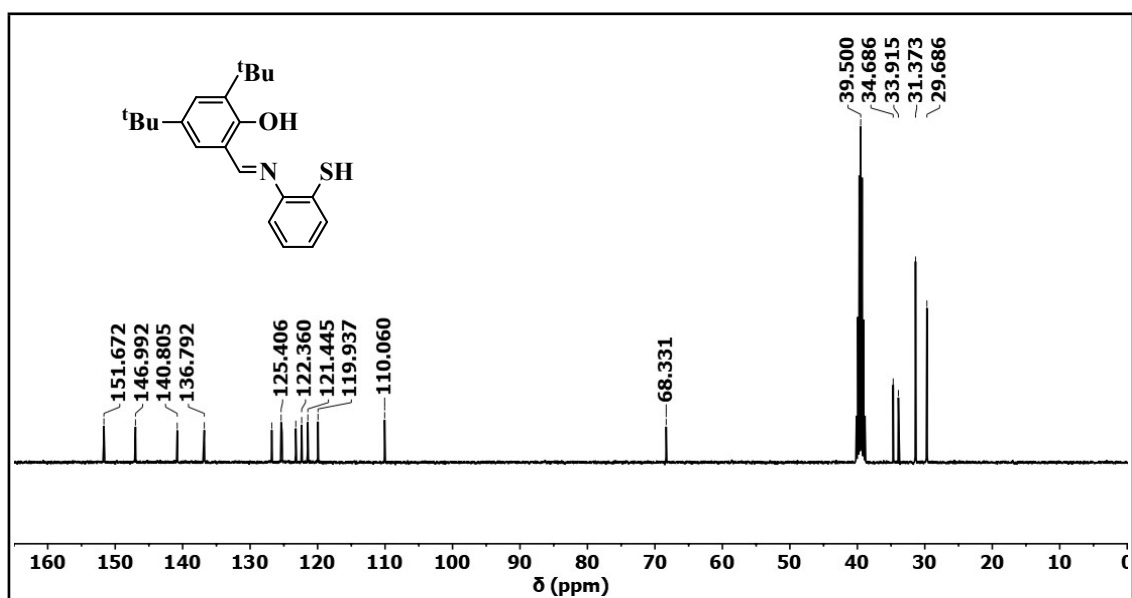

Figure S2:  $^{13}C$  NMR spectrum (400 MHz, DMSO- $d_6$ ) of  $H_2L^{tBu}$

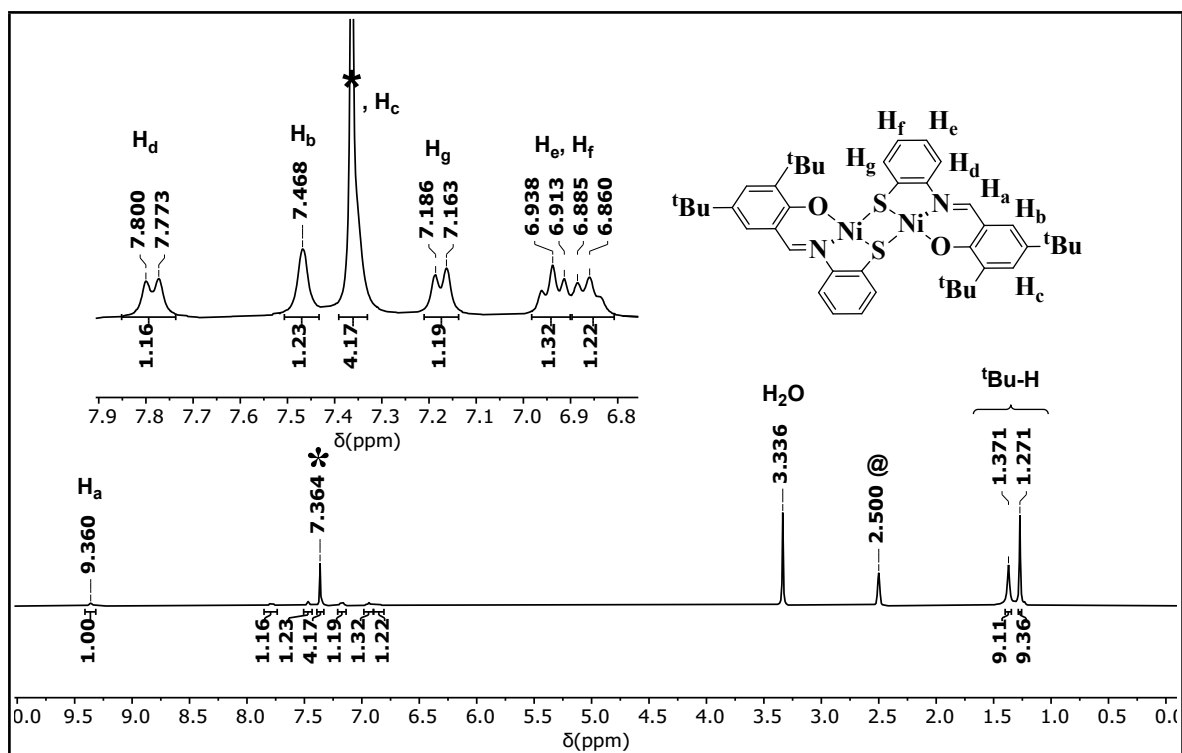

Figure S3A:  $^1\text{H}$  NMR spectrum (400 MHz,  $\text{DMSO-d}_6$ ) of  $[(\text{NiL}^{\text{tBu}})_2]$  ( $1^{\text{tBu}}$ )

\*Benzene, @  $\text{DMSO-d}_6$

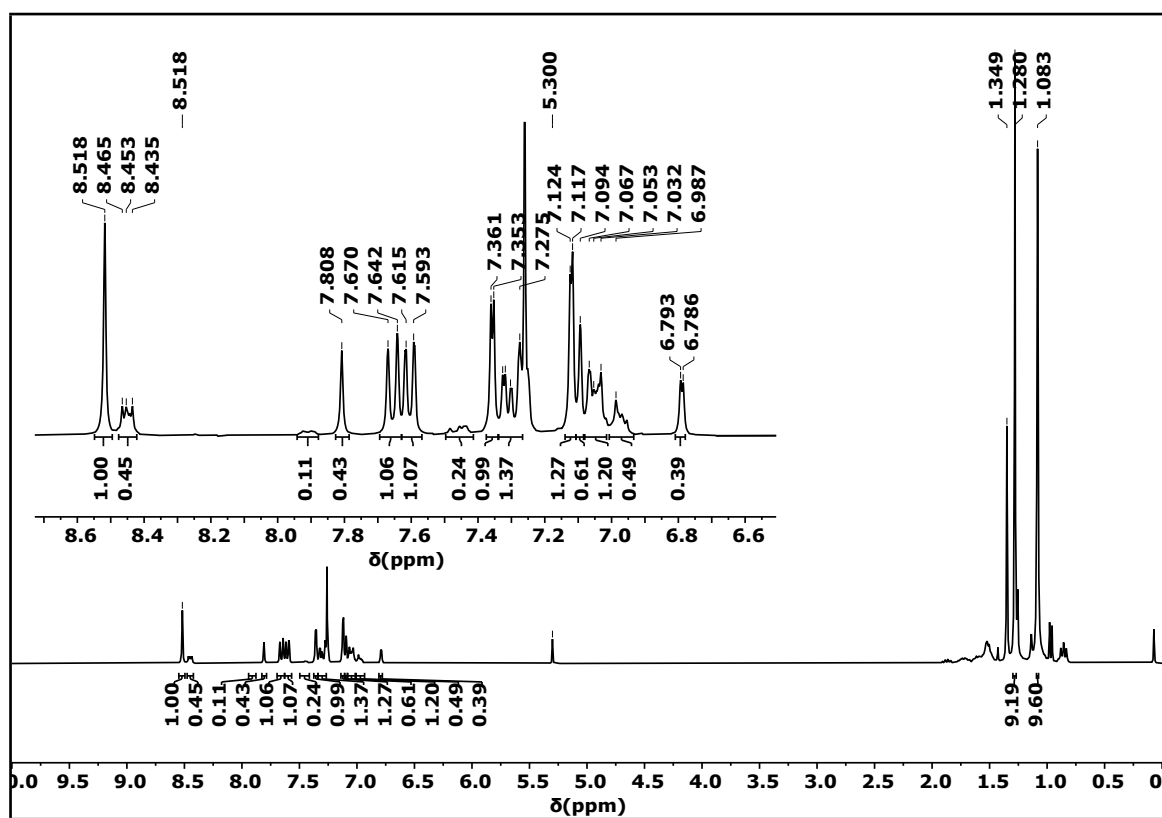

Figure S3B:  $^1\text{H}$  NMR spectrum (400 MHz,  $\text{CDCl}_3$ ) of  $1^{\text{tBu}}$

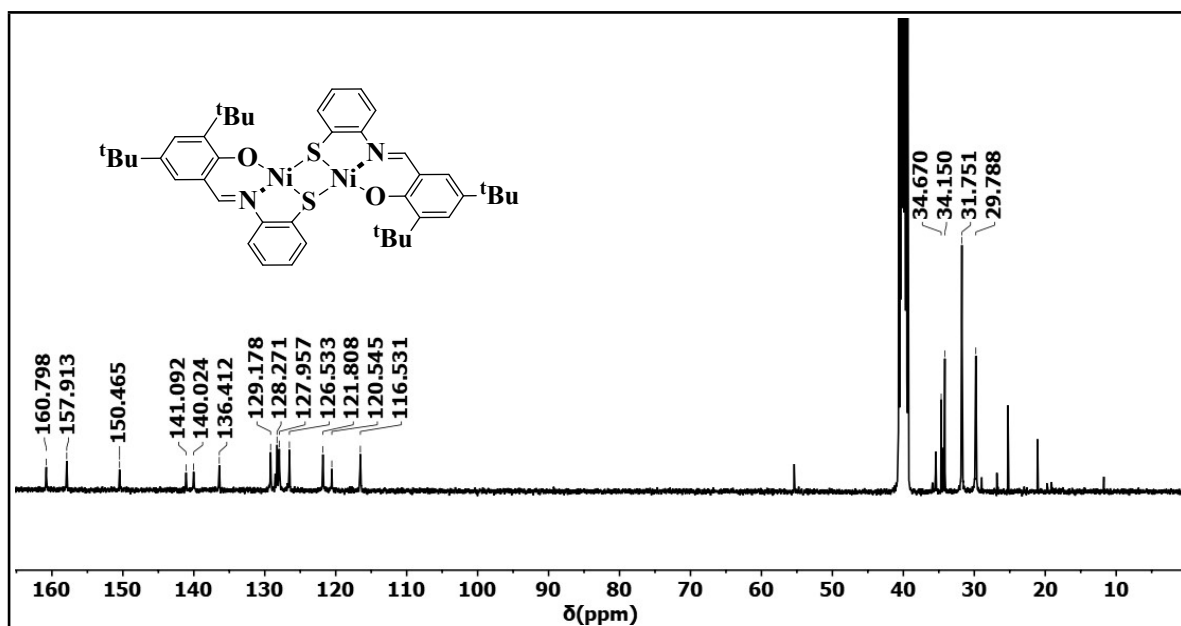

Figure S4:  $^{13}C$  NMR spectrum (400 MHz, DMSO- $d_6$ ) of  $[(NiL^{tBu})_2]$  ( $1^{tBu}$ )

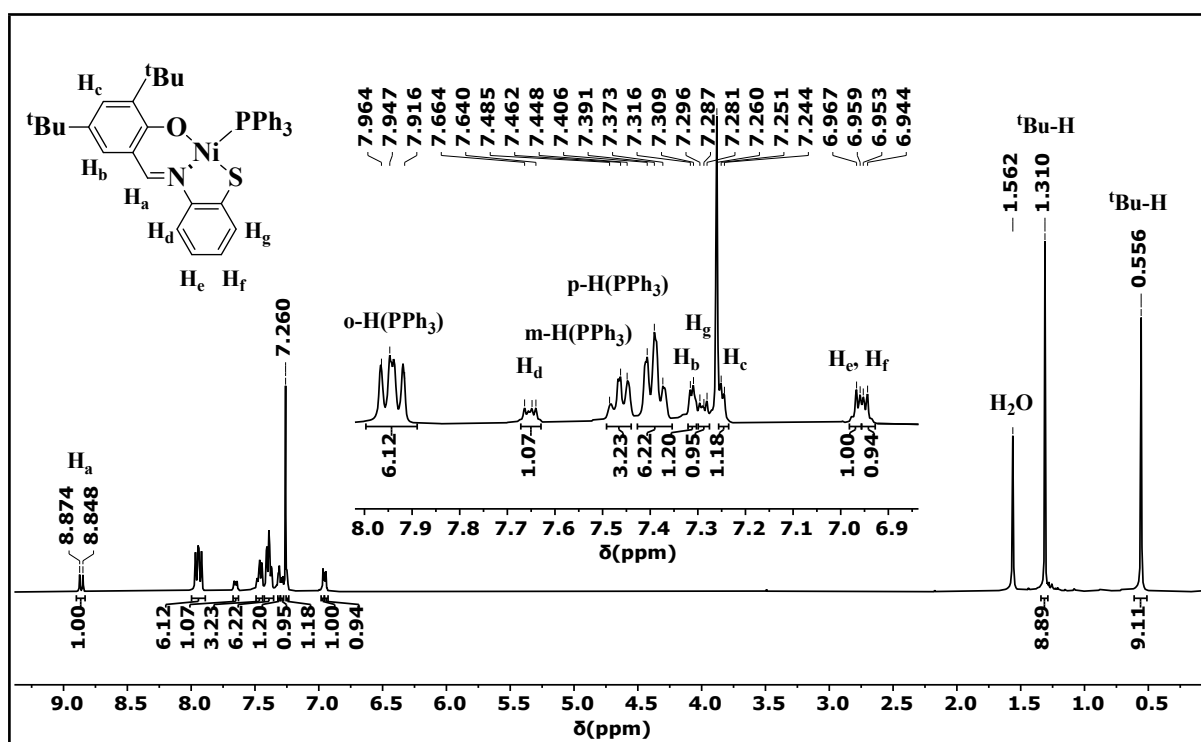

Figure S5:  $^1H$  NMR spectrum (400 MHz,  $CDCl_3$ ) of  $[NiL^{tBu}(PPh_3)]$  ( $2^{tBu}$ )

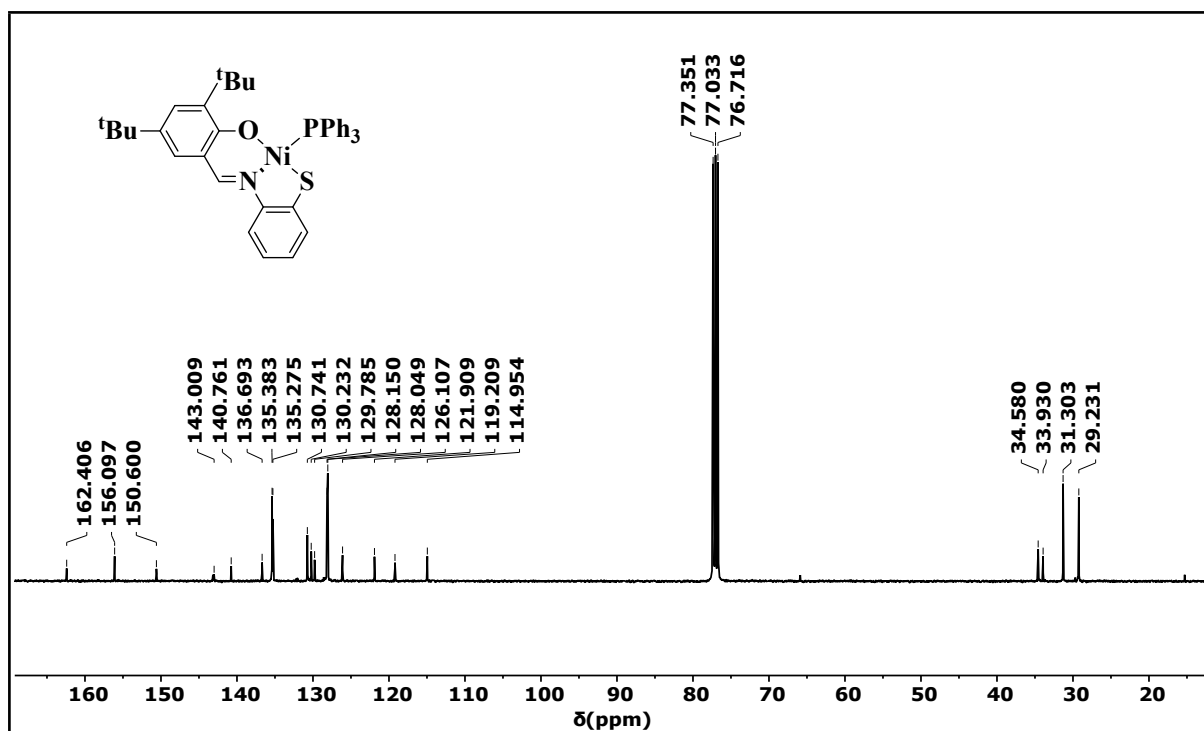

Figure S6:  $^{13}C$  NMR spectrum (400 MHz,  $CDCl_3$ ) of  $[NiL^{tBu}(PPh_3)]$  ( $2^{tBu}$ )

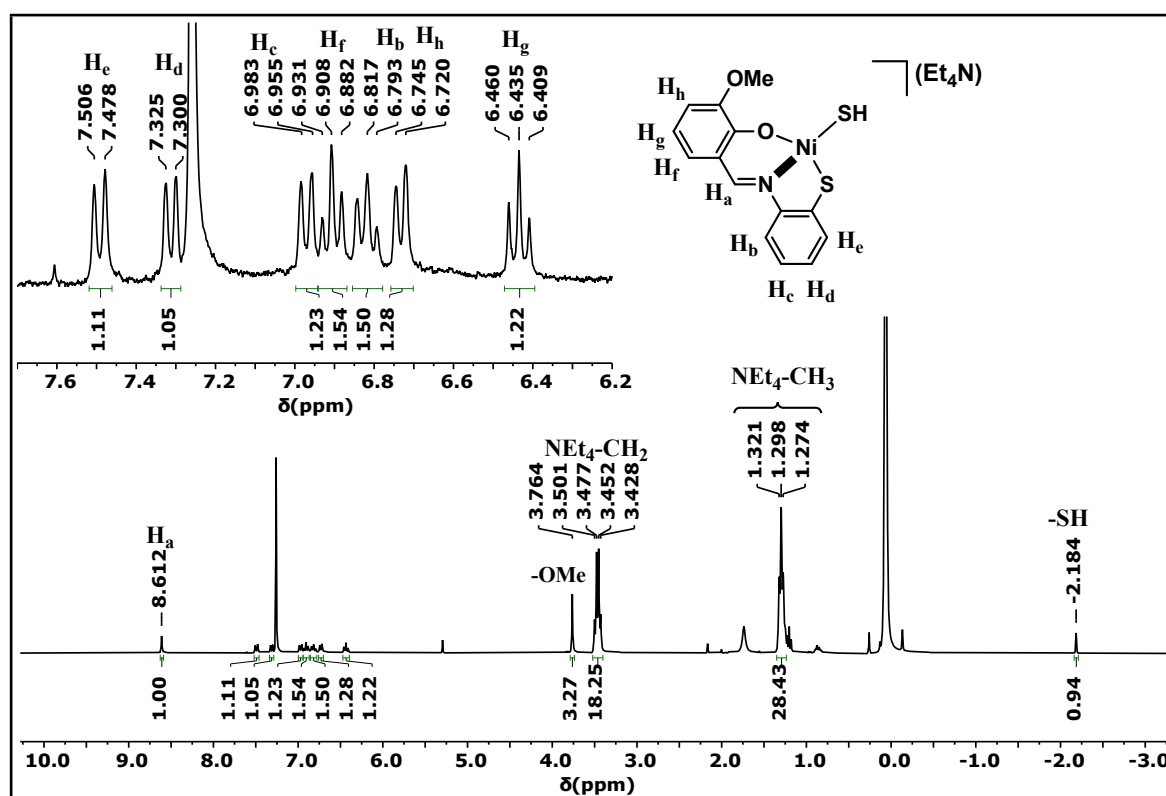

Figure S7:  $^1H$  NMR spectrum (400 MHz,  $CDCl_3$ ) of  $[NiL^{OMe}(SH)]$  ( $3^{OMe}$ ,  $(Et_4N)$ )

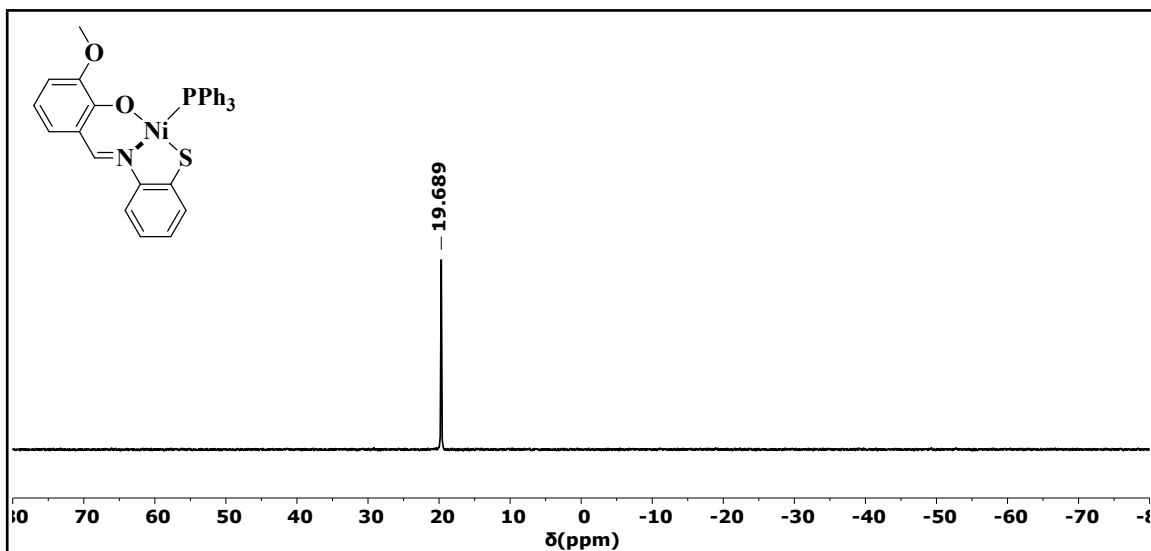

Figure S9:  $^{31}\text{P}\{^1\text{H}\}$  NMR spectrum (400 MHz,  $\text{CDCl}_3$ ) of  $[\text{NiL}^{\text{OMe}}(\text{PPh}_3)]$  ( $3^{\text{OMe}}$ ).

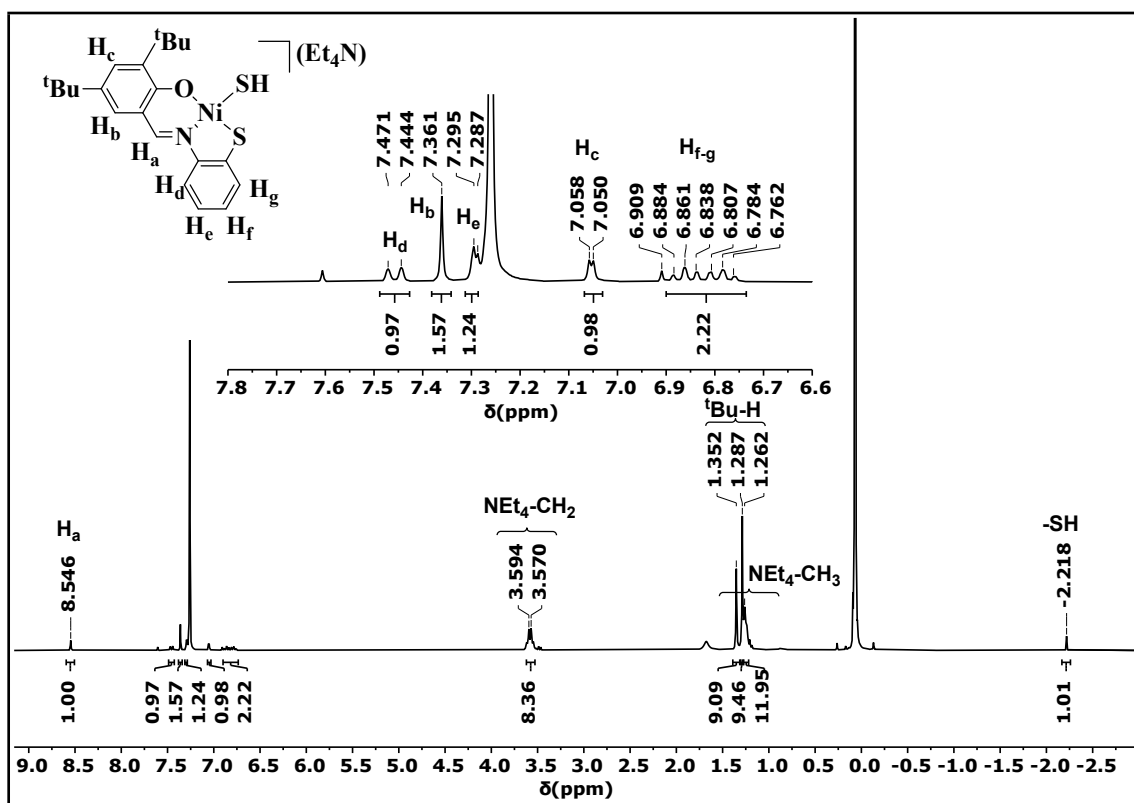

Figure S10:  $^1\text{H}$  NMR spectrum (400 MHz,  $\text{CDCl}_3$ ) of  $[\text{NiL}^{\text{tBu}}(\text{SH})](3^{\text{tBu}}, (\text{Et}_4\text{N}))$ .

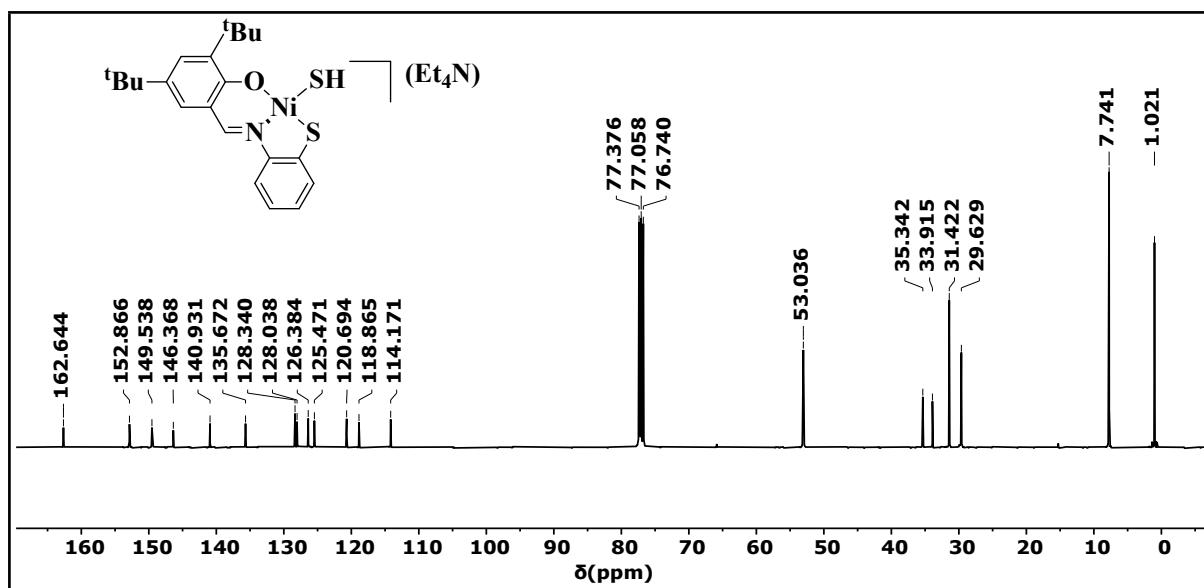

Figure S11:  $^{13}\text{C}$  NMR spectrum (400 MHz,  $\text{CDCl}_3$ ) of  $[\text{NiL}^{\text{tBu}}(\text{SH})](3^{\text{tBu}}) \cdot (\text{Et}_4\text{N})$

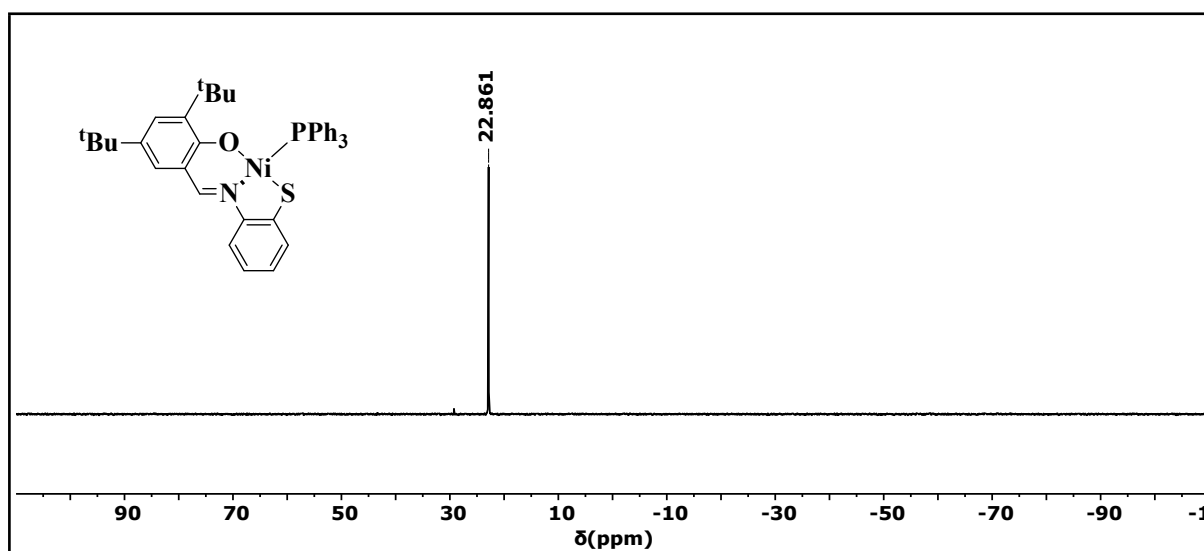

Figure S12:  $^{31}\text{P}\{^1\text{H}\}$  NMR spectrum (400 MHz,  $\text{CDCl}_3$ ) of  $[\text{NiL}^{\text{tBu}}(\text{PPh}_3)](2^{\text{tBu}})$ .



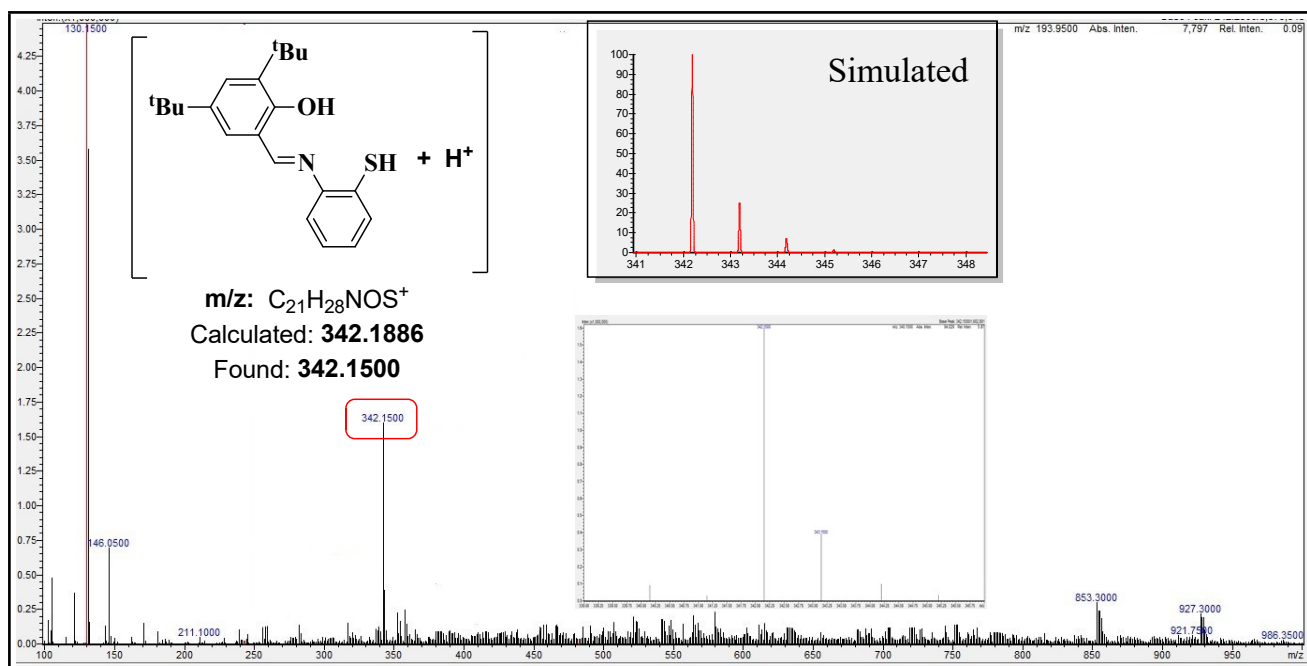

**Figure S13:** LC-MS mass spectrum of  $H_2L^{tBu}$  along with simulated spectrum inset (using Isopro3.0 program).

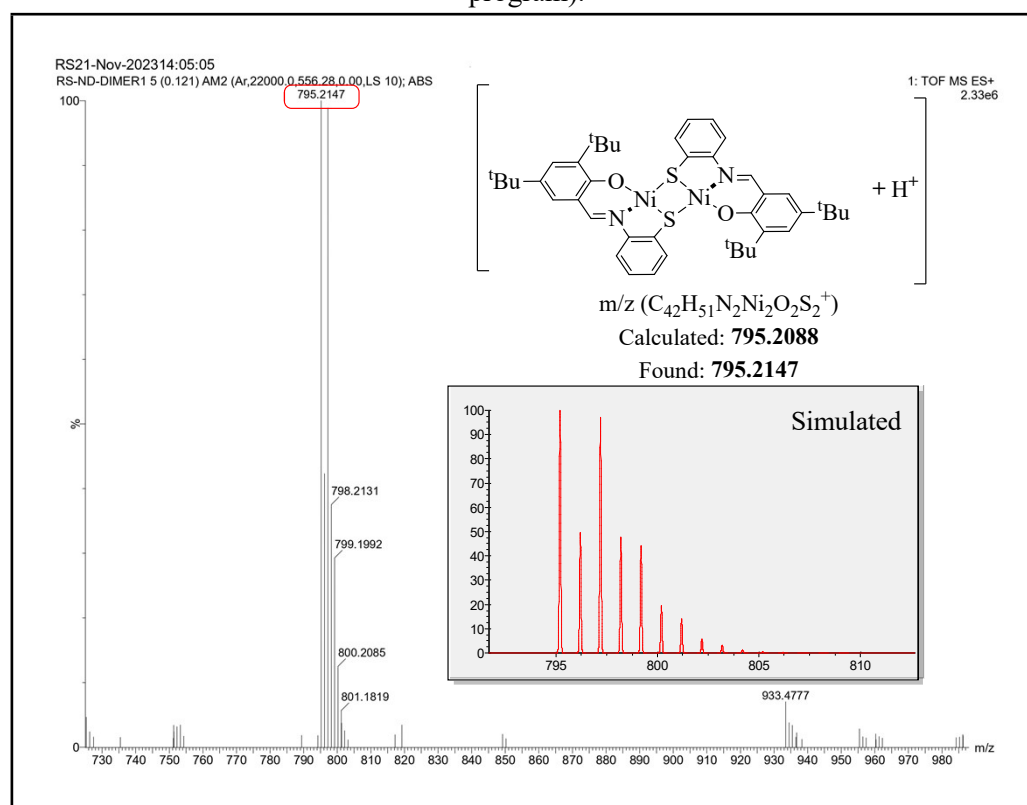

**Figure S14:** HRMS (ESI<sup>+</sup>) spectrum of  $[NiL^{tBu}]_2$  ( $1^{tBu}$ ) along with simulated spectrum inset (using Isopro3.0 program).

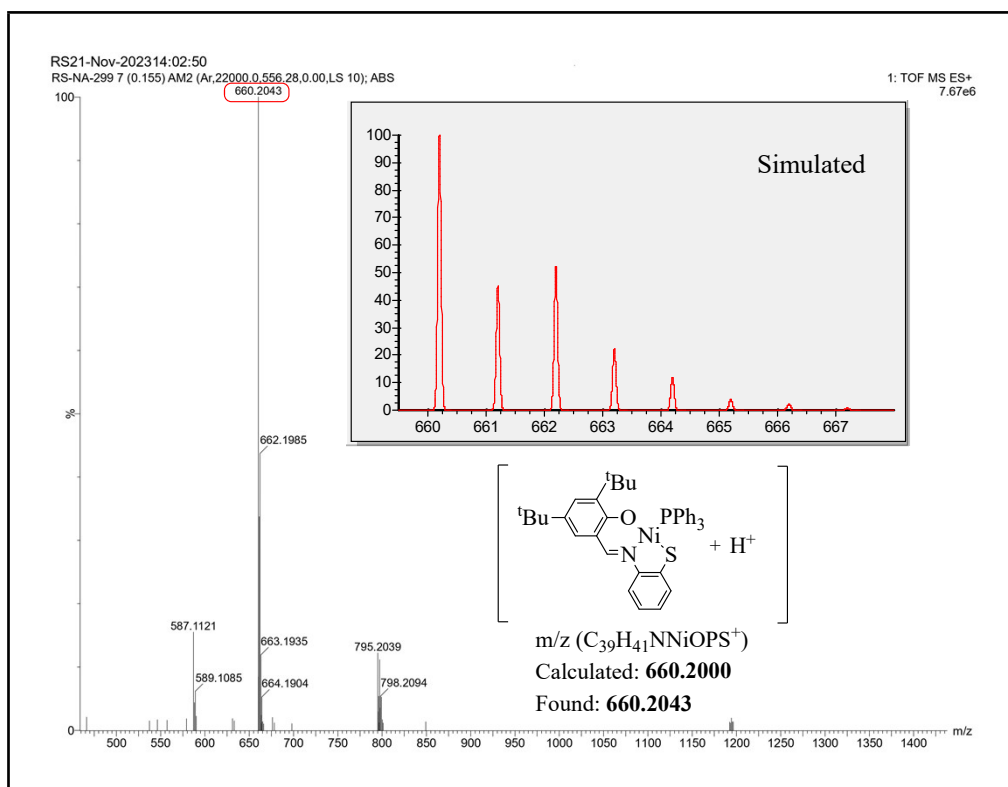

**Figure S15:** HRMS (ESI<sup>+</sup>) spectrum of [NiL<sup>tBu</sup>(PPh<sub>3</sub>)] (2<sup>tBu</sup>) along with simulated spectrum inset (using Isopro3.0 program).

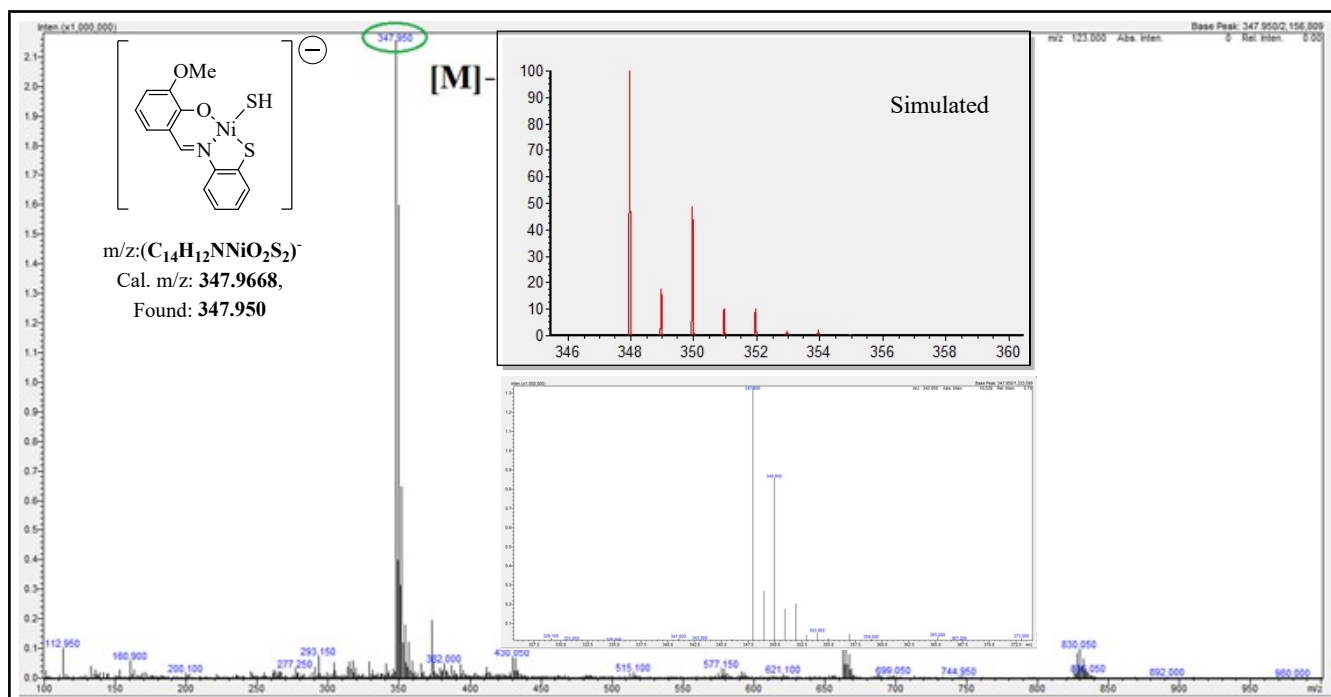

**Figure S16:** LCMS (ESI<sup>-</sup>) spectrum of [NiL<sup>OMe</sup>(SH)] (**3<sup>OMe</sup>**, (**Et<sub>4</sub>N**)) along with simulated spectrum inset (using Isopro3.0 program).

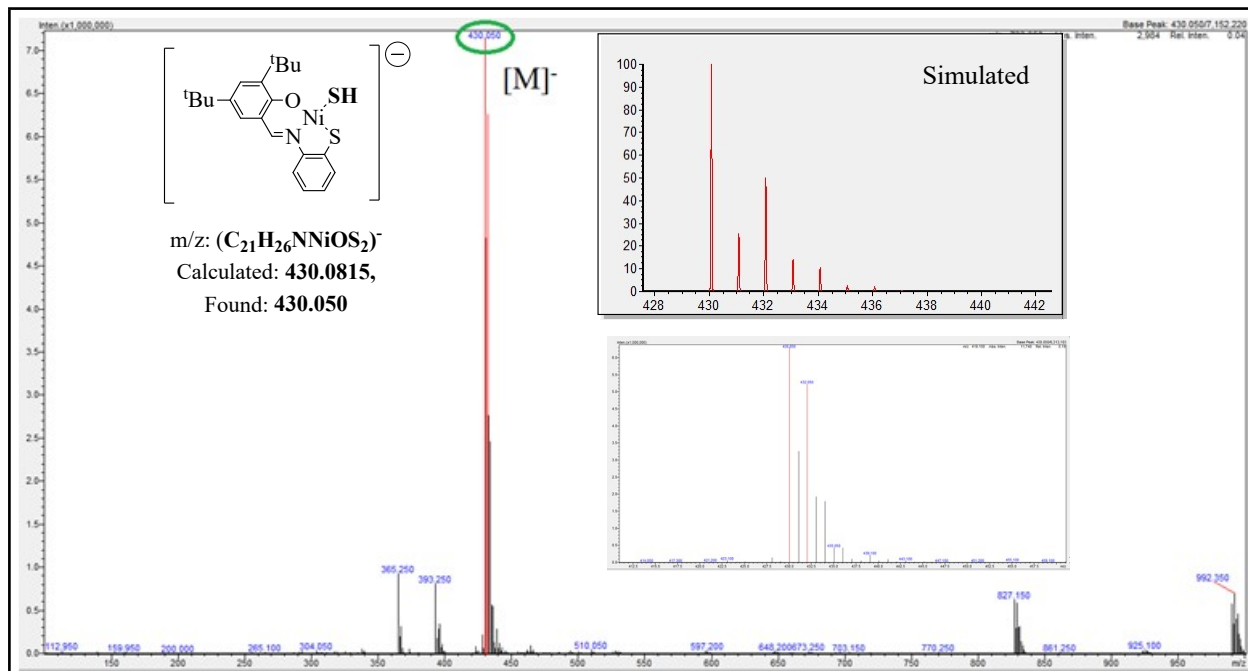

**Figure S17:** LC-MS (ESI<sup>-</sup>) spectrum of [NiL<sup>tBu</sup>(SH)] (**3<sup>tBu</sup>**, (**Et<sub>4</sub>N**)) along with simulated spectrum inset (using Isopro3.0 program).

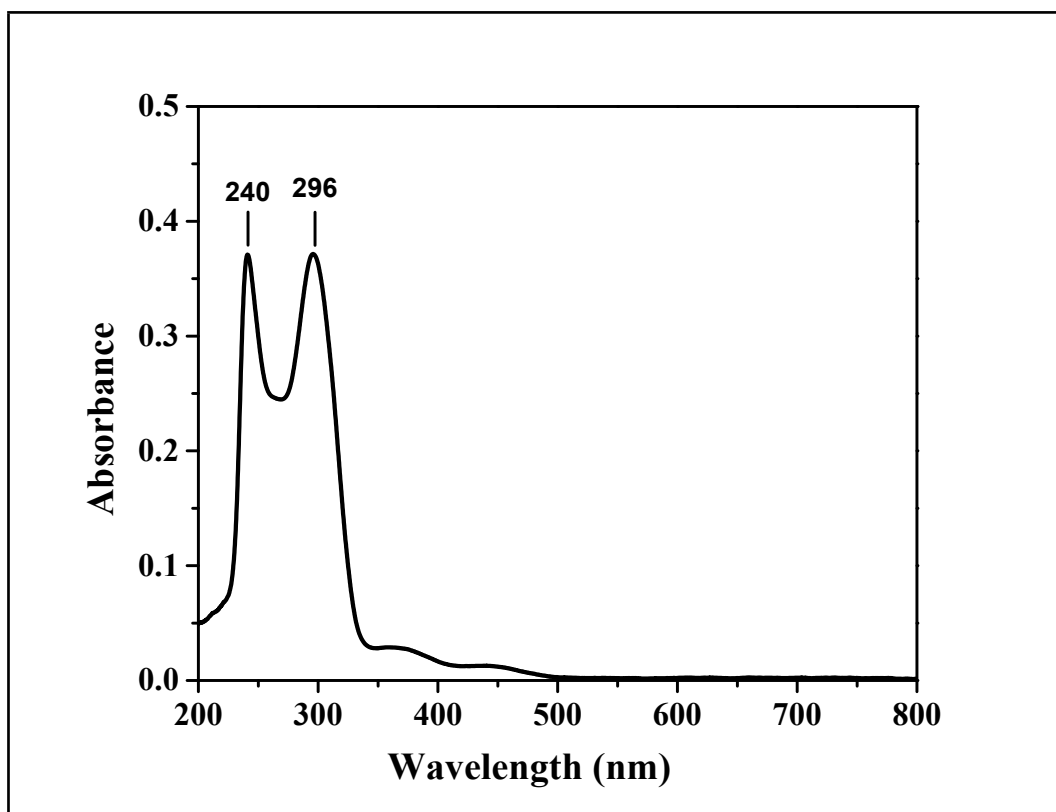

Figure S18: UV-vis spectra of  $H_2L^{tBu}$  ( $5 \times 10^{-5} M$ ) in acetonitrile at 25 °C).

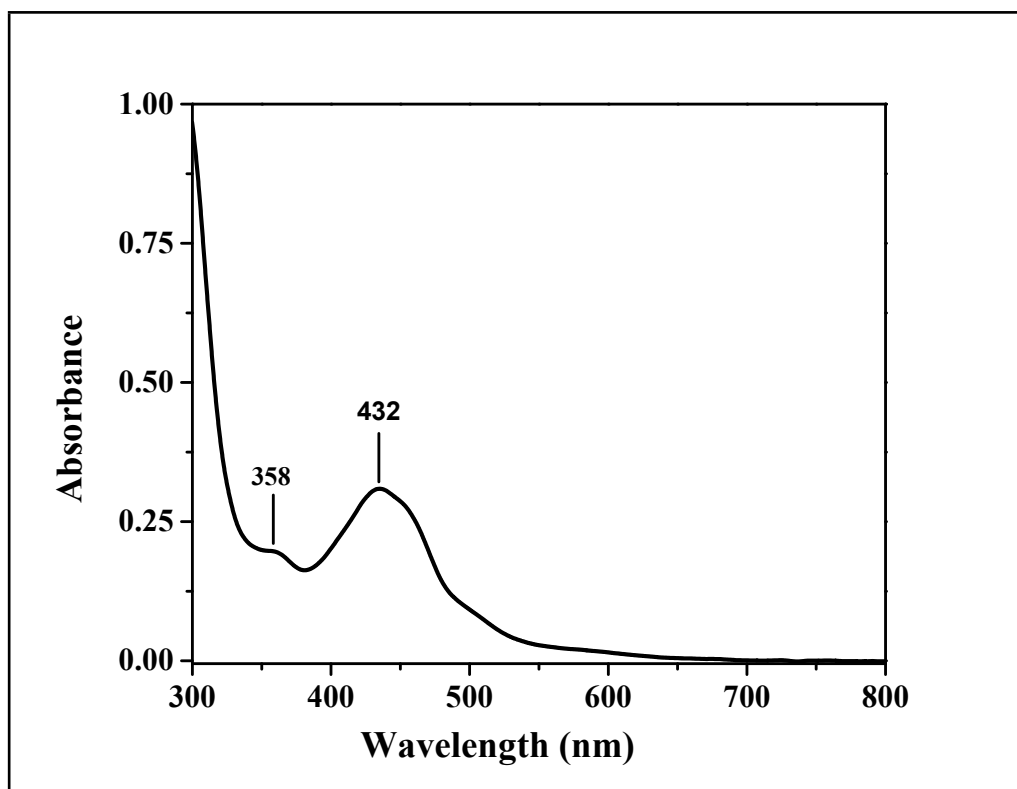

Figure S19: UV-vis spectra of  $[(NiL^{tBu})_2]$  ( $1^{tBu}$ ) ( $5 \times 10^{-5} M$ ) in acetonitrile at 25 °C)

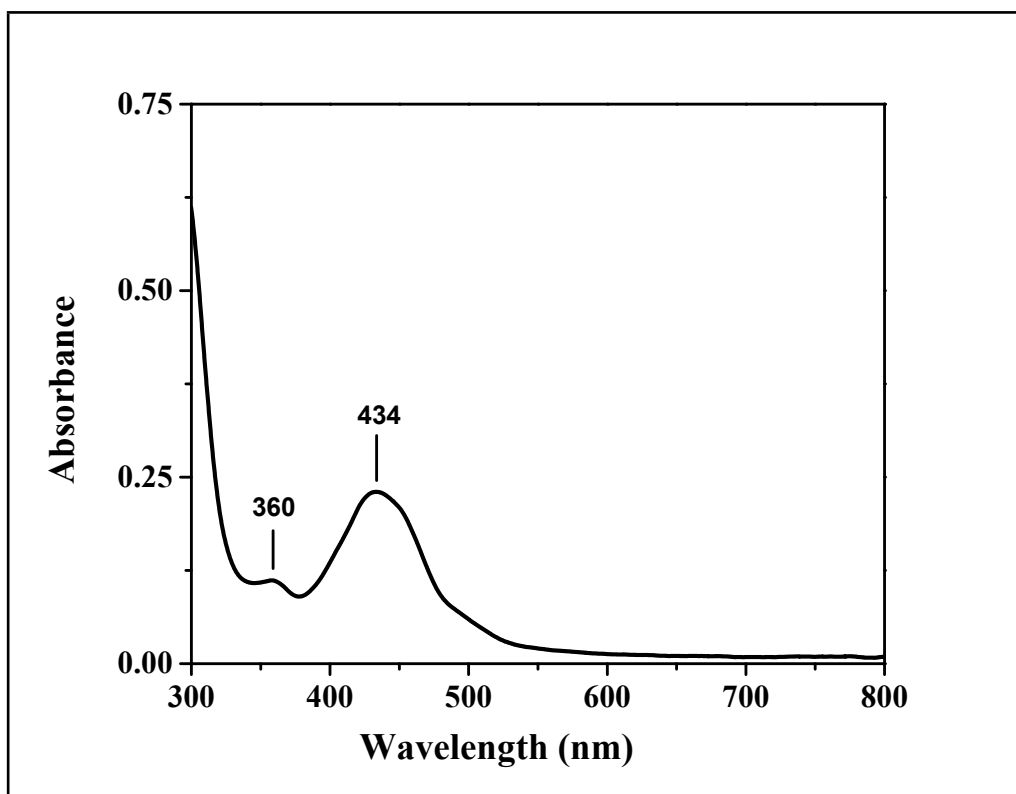

Figure S20: UV-vis spectra of [NiL<sup>tBu</sup>(PPh<sub>3</sub>)] (2<sup>tBu</sup>) ( $5 \times 10^{-5}$ (M) in acetonitrile at 25 °C)

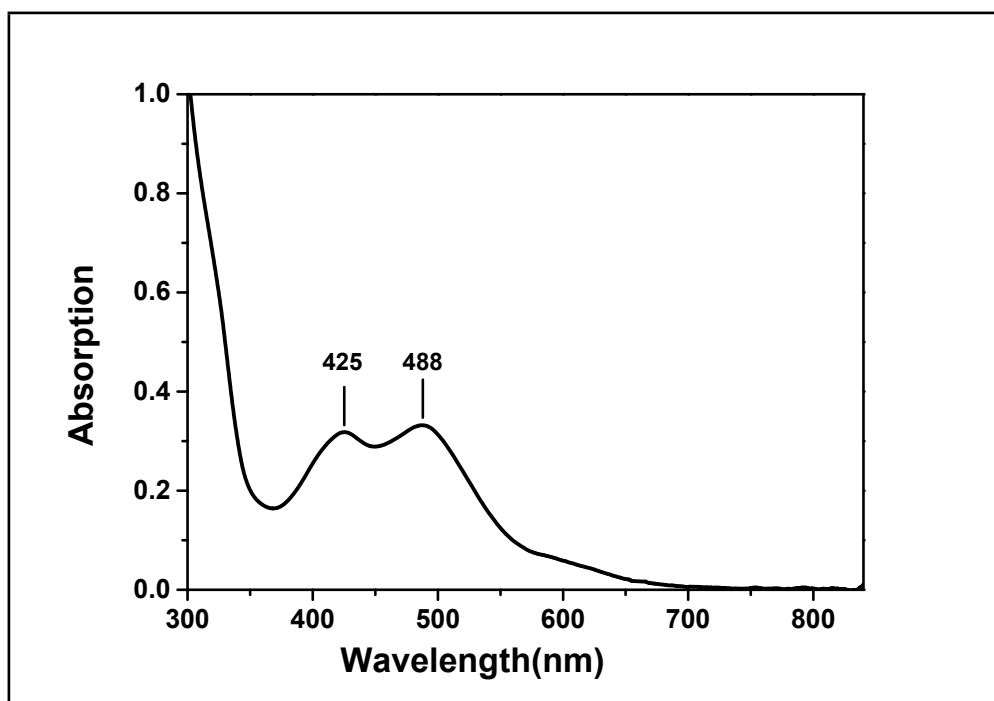

Figure S21: UV-vis spectra of [NiL<sup>OMe</sup>(SH)] (3<sup>OMe</sup>, (Et<sub>4</sub>N)) ( $5 \times 10^{-5}$ (M) in acetonitrile at 25 °C)

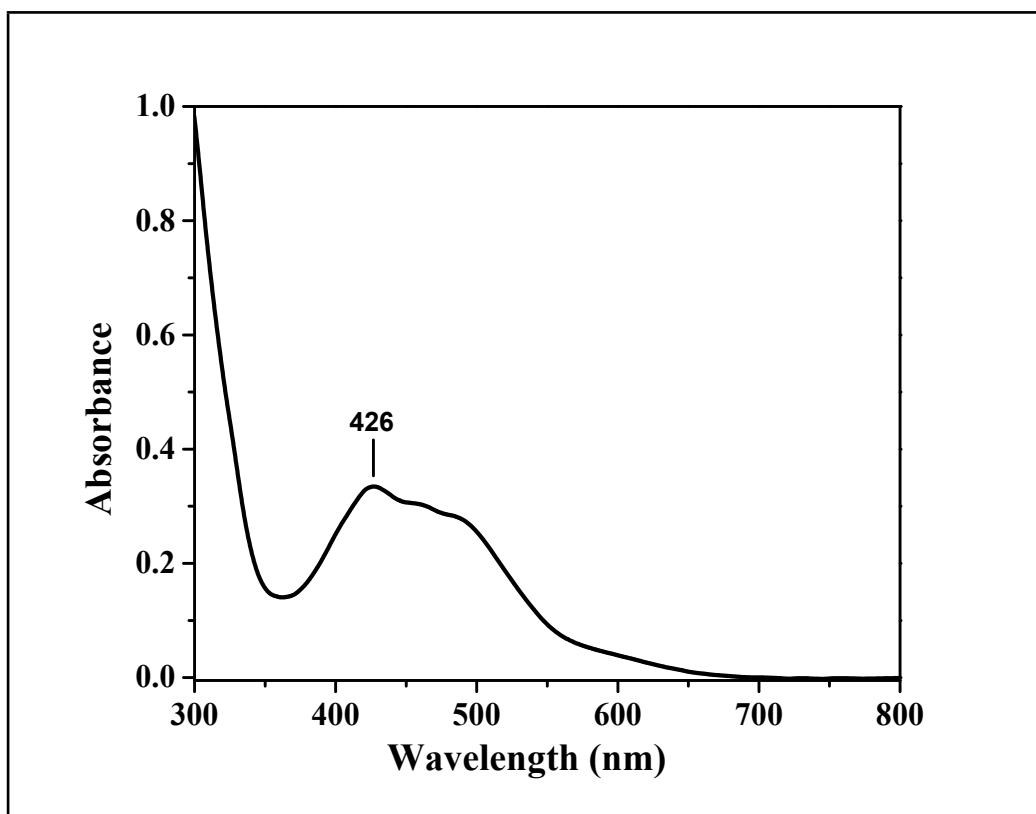

Figure S22: UV-vis spectra of  $[\text{NiL}^{\text{tBu}}(\text{SH})] (3^{\text{tBu}} \cdot (\text{Et}_4\text{N})) (5 \times 10^{-5}(\text{M})$  in acetonitrile at 25 °C)

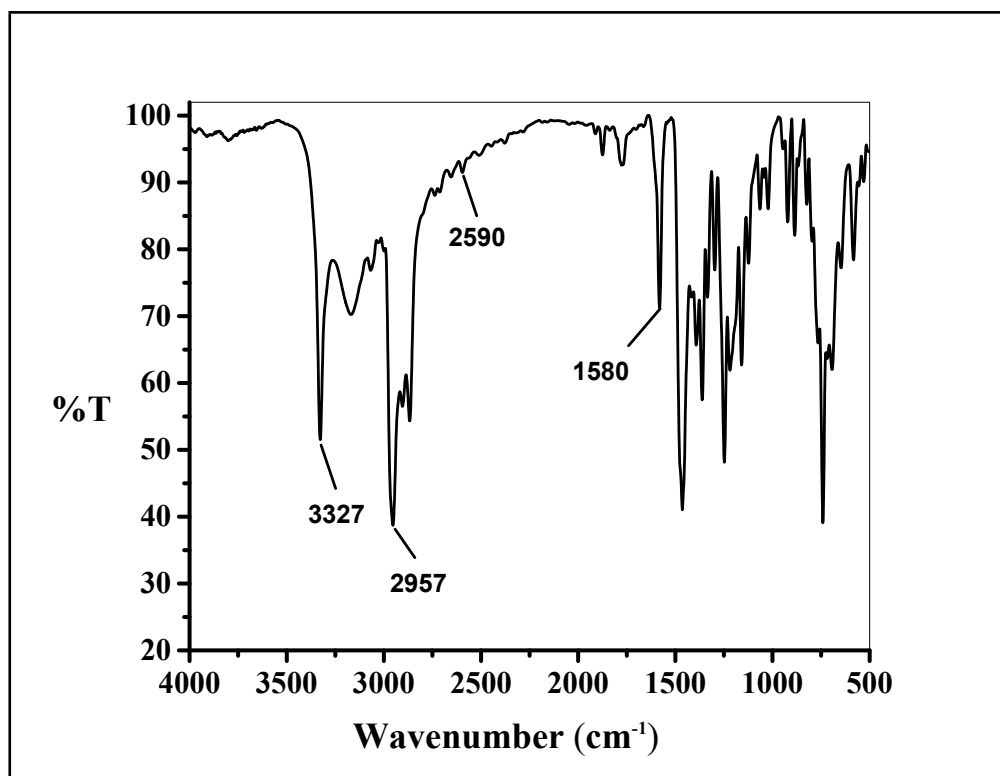

Figure S23: FT-IR (KBr Pellet) spectra of  $\text{H}_2\text{L}^{\text{tBu}}$ .

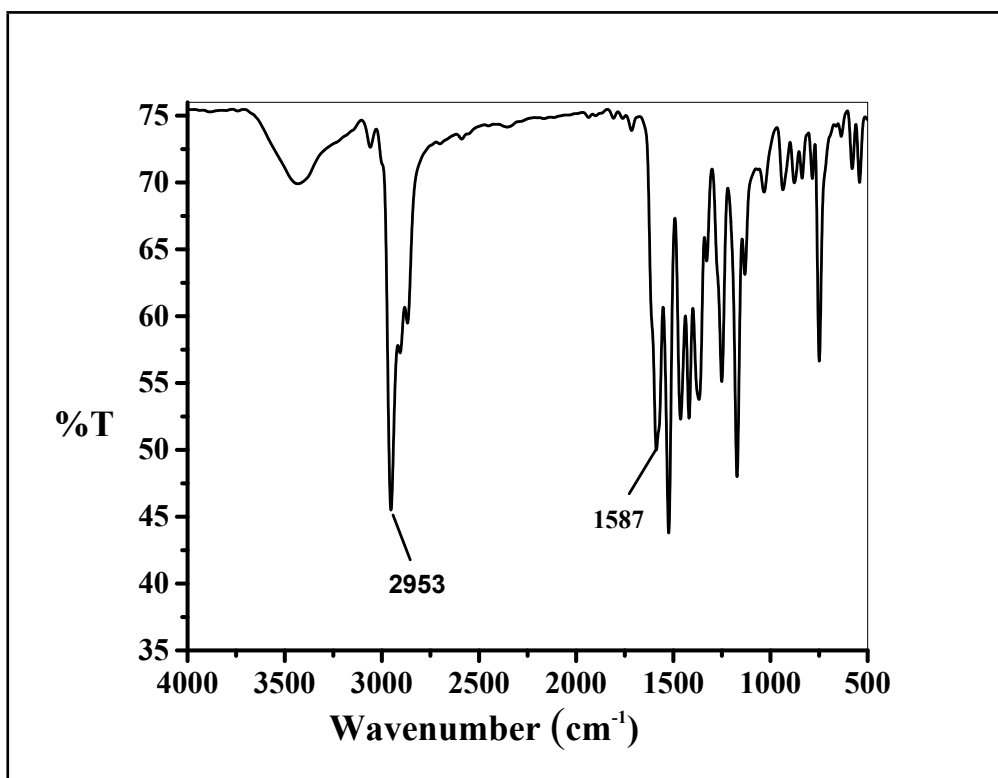

Figure S24: FT-IR (KBr Pellet) spectra of  $[(\text{NiL}^{\text{tBu}})_2]$  ( $1^{\text{tBu}}$ ).

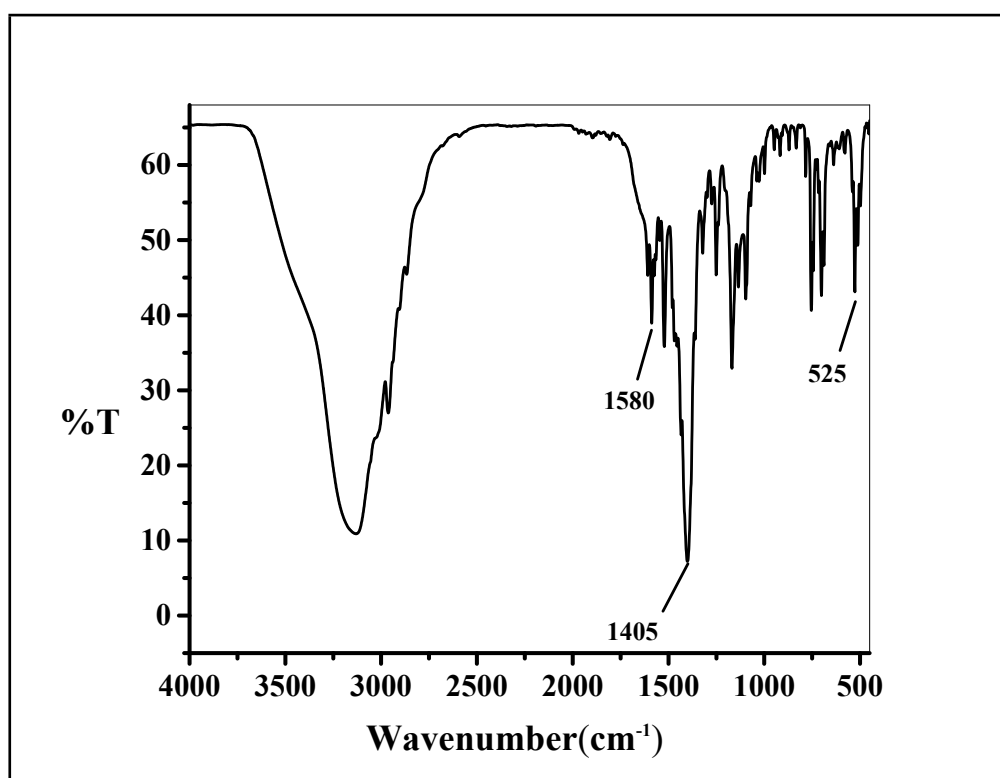

Figure S25: FT-IR (KBr Pellet) spectra of  $[\text{NiL}^{\text{tBu}}(\text{PPh}_3)]$  ( $2^{\text{tBu}}$ ).

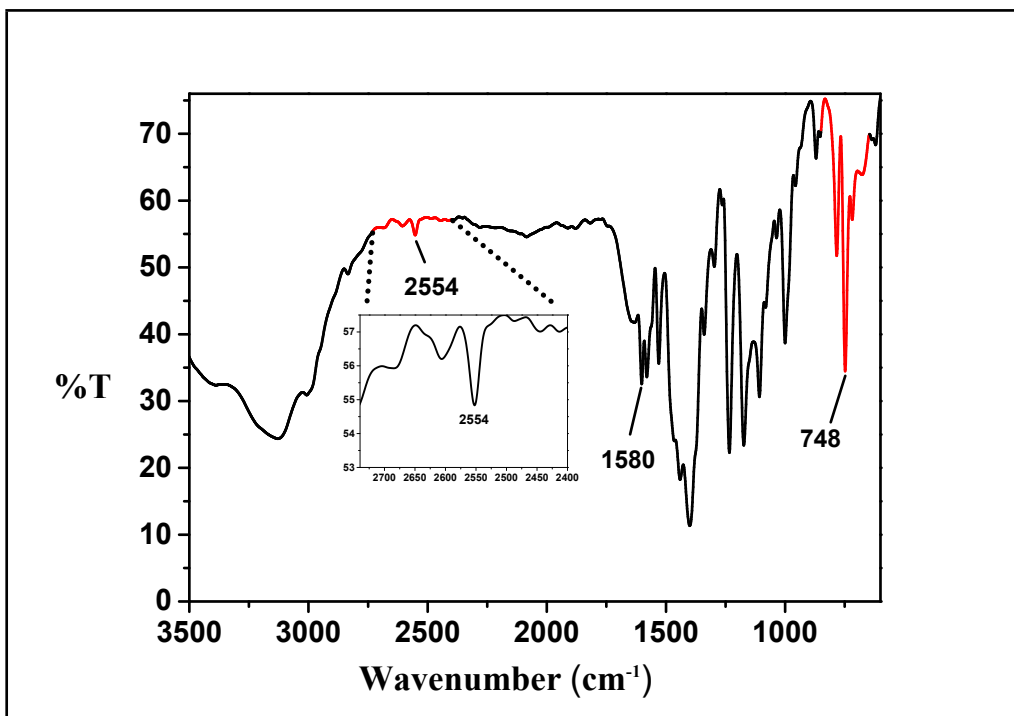

Figure S26: FT-IR (KBr Pellet) spectra of  $[\text{NiL}^{\text{OMe}}(\text{SH})]$  ( $3^{\text{OMe}}$ ,  $(\text{Et}_4\text{N})$ ).

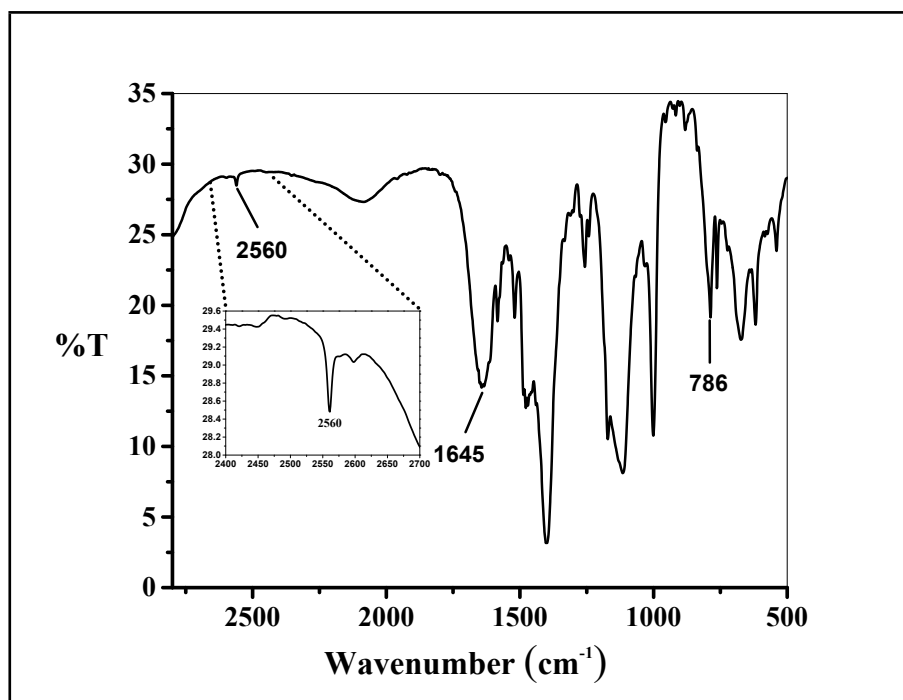

Figure S27: FT-IR (KBr Pellet) spectra of  $[\text{NiL}^{\text{tBu}}(\text{SH})]$  ( $3^{\text{tBu}}$ ,  $(\text{Et}_4\text{N})$ ).



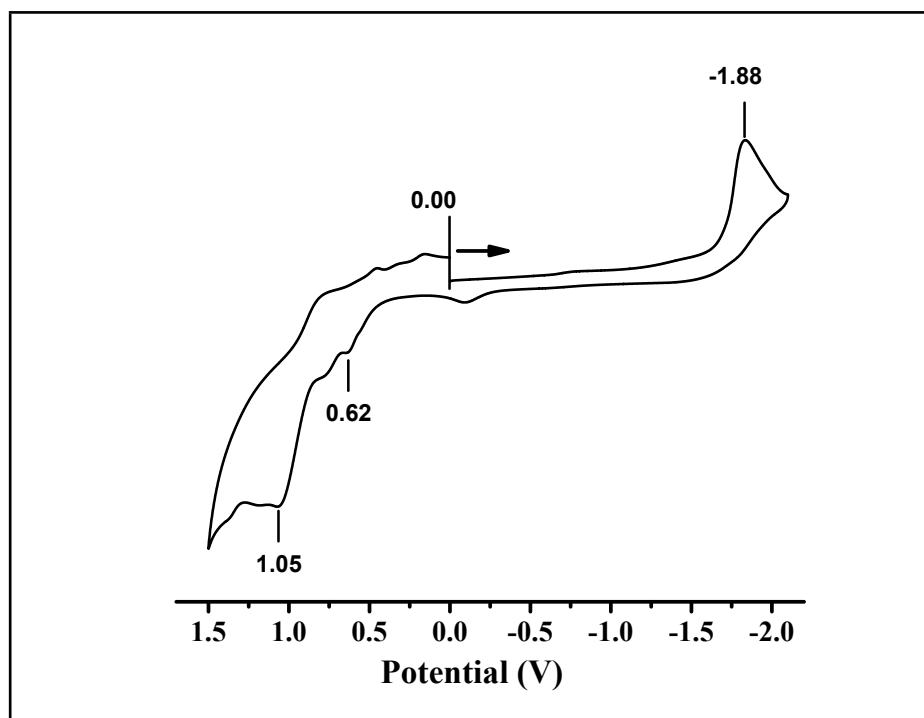

**Figure S28:** Cyclic voltammogram of  $\text{H}_2\text{L}^{\text{OMe}}$  in DMF (scan speed: 100 mV/s, 0.1 M  ${}^n\text{Bu}_4\text{N}(\text{ClO}_4)$  supporting electrolyte, glassy carbon working electrode, Pt-wire counter electrode, Ag/AgCl reference electrode, RT, Arrow indicates direction of the scan).

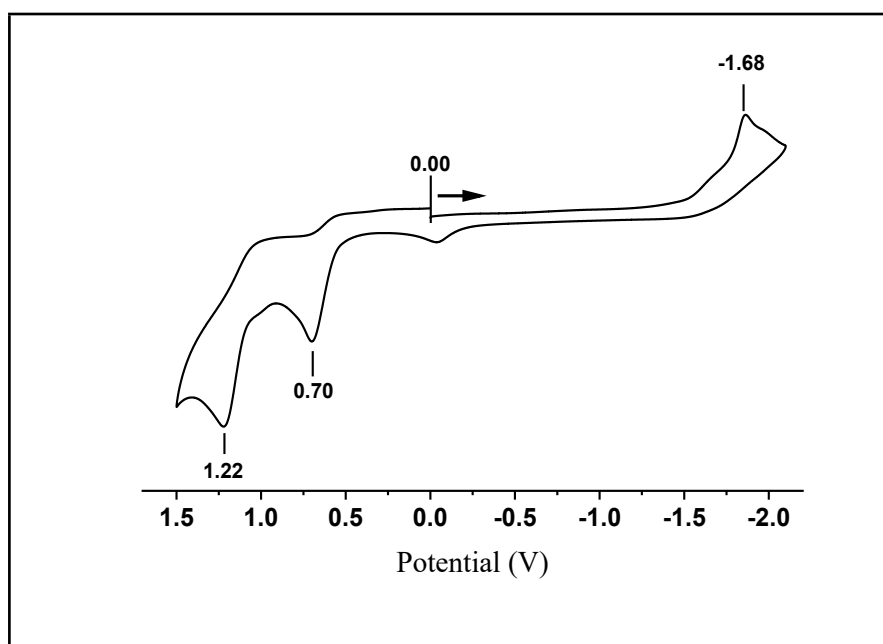

**Figure S29:** Cyclic voltammogram of  $\text{H}_2\text{L}^{\text{tBu}}$  in DMF (scan speed: 100 mV/s, 0.1 M  ${}^n\text{Bu}_4\text{N}(\text{ClO}_4)$  supporting electrolyte, glassy carbon working electrode, Pt-wire counter electrode, Ag/AgCl reference electrode, RT, Arrow indicates direction of the scan).

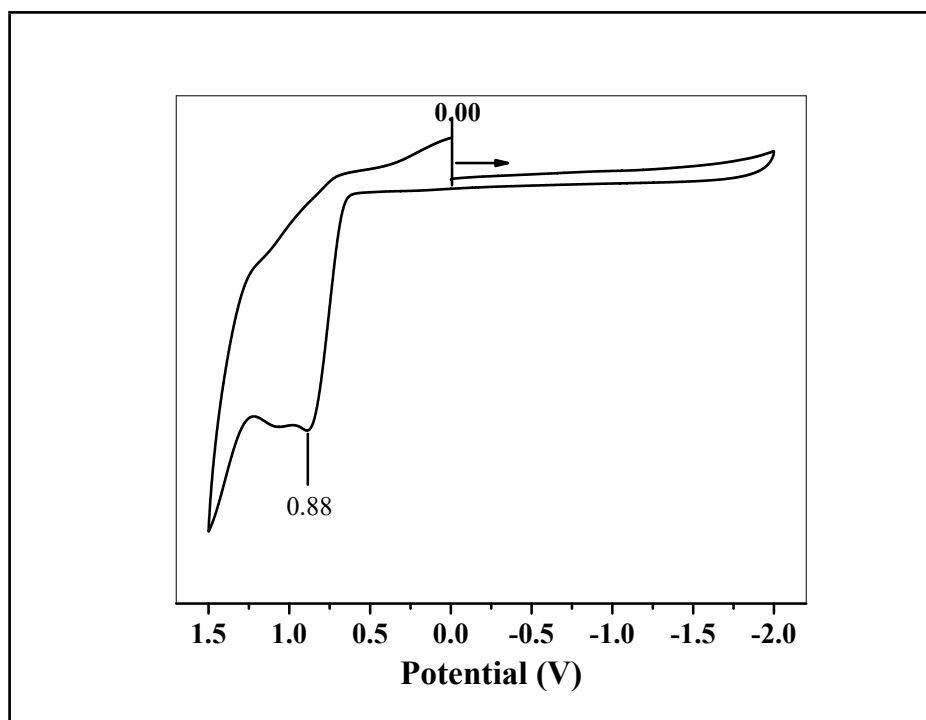

**Figure S30:** Cyclic voltammogram of  $\text{NEt}_4\text{SH}$  in DMF (scan speed: 100 mV/s, 0.1 M  $n\text{Bu}_4\text{N}(\text{ClO}_4)$  supporting electrolyte, glassy carbon working electrode, Pt-wire counter electrode, Ag/AgCl reference electrode, RT, Arrow indicates direction of the scan).

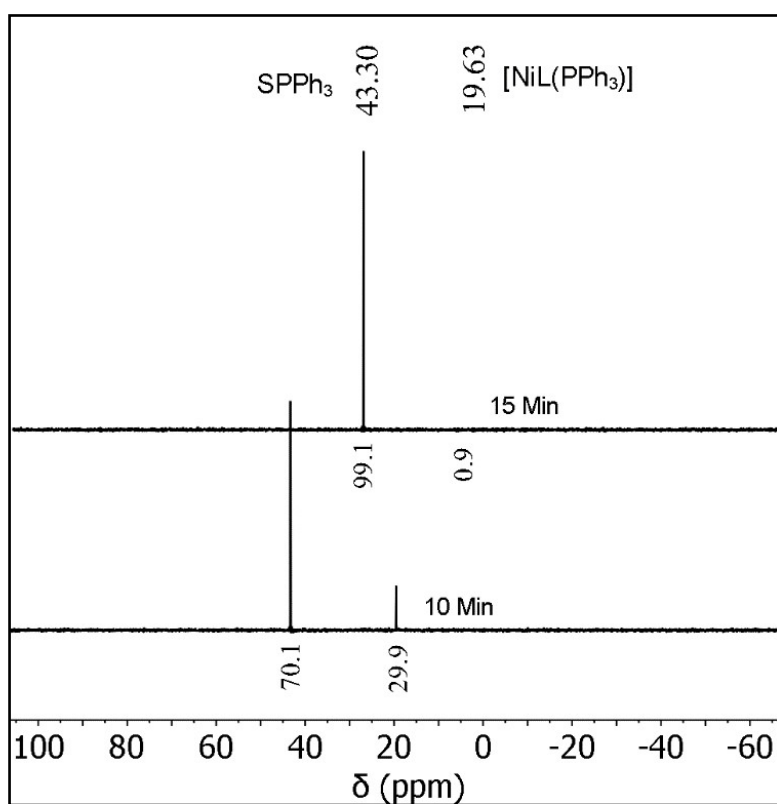

**Figure S31:** Reaction of  $[\text{NiL}^{\text{OMe}}(\text{PPh}_3)]$  with  $\text{Et}_4\text{NSH}$  (1:2.2 ratio) in  $\text{CDCl}_3$  at  $70^\circ\text{C}$ .

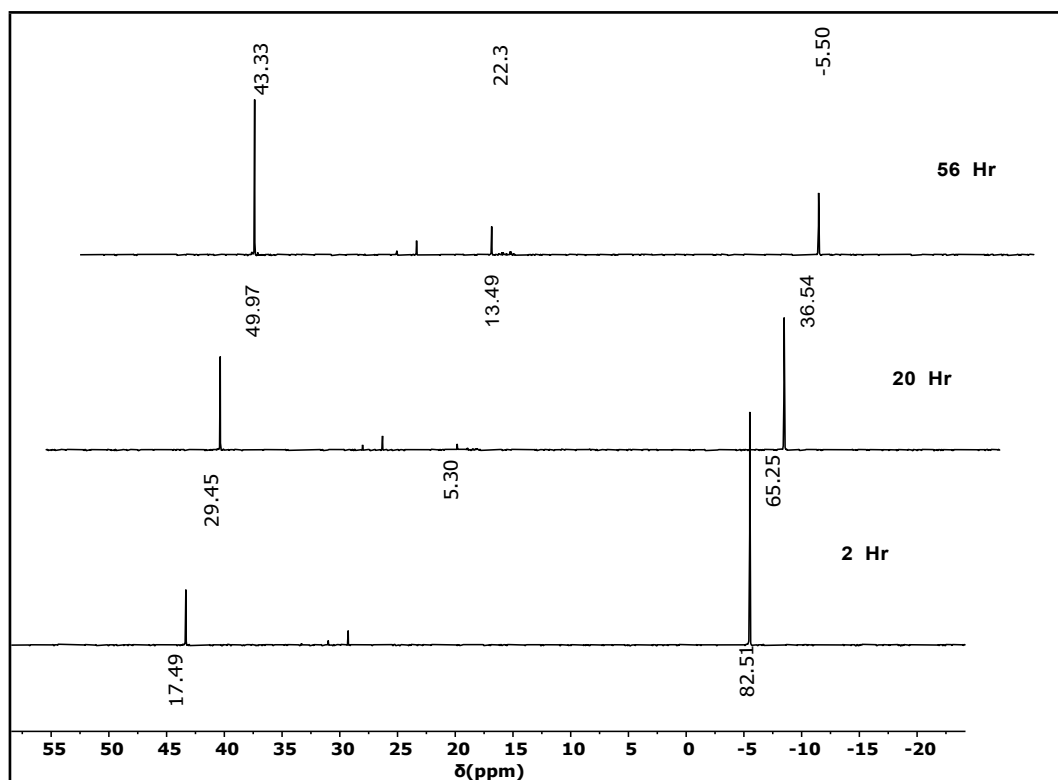

**Figure S32.**  $^{31}\text{P}\{^1\text{H}\}$  NMR spectral changes with time for the reaction of  $2^{\text{tBu}}$  and  $\text{Et}_4\text{NSH}$  using 1:1 mol ratio at RT in  $\text{CDCl}_3$ .

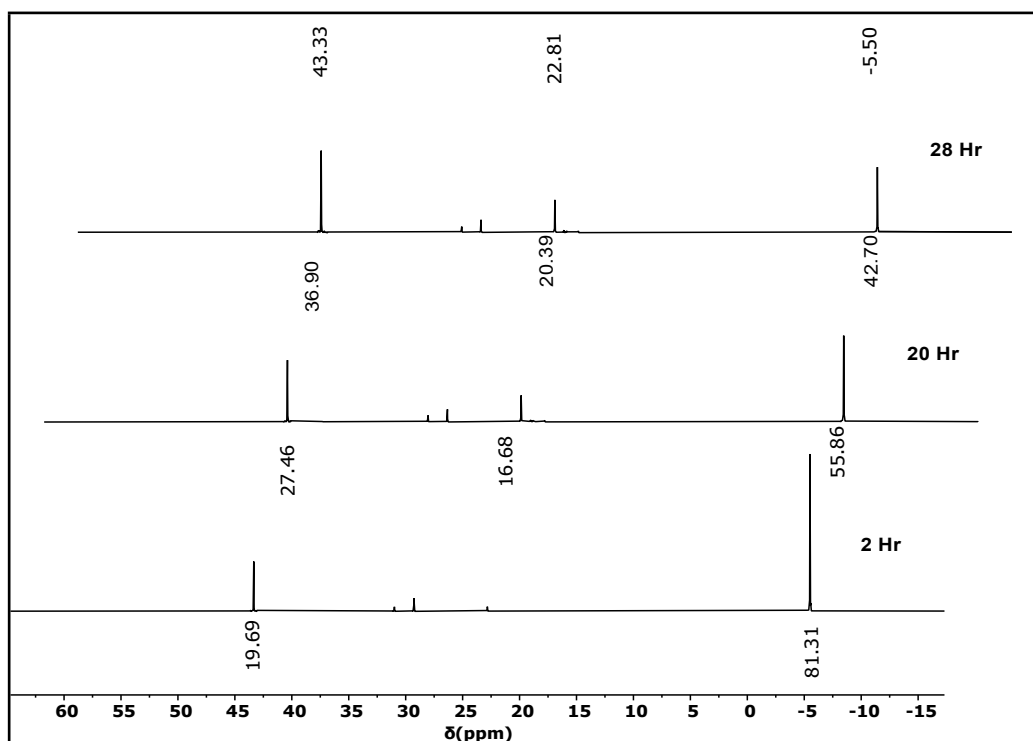

**Figure S33.**  $^{31}\text{P}\{^1\text{H}\}$  NMR spectral changes with time in  $\text{CDCl}_3$  for the reaction of  $2^{\text{tBu}}$  and  $\text{Et}_4\text{NSH}$  using 1:2 mol ratio at RT.

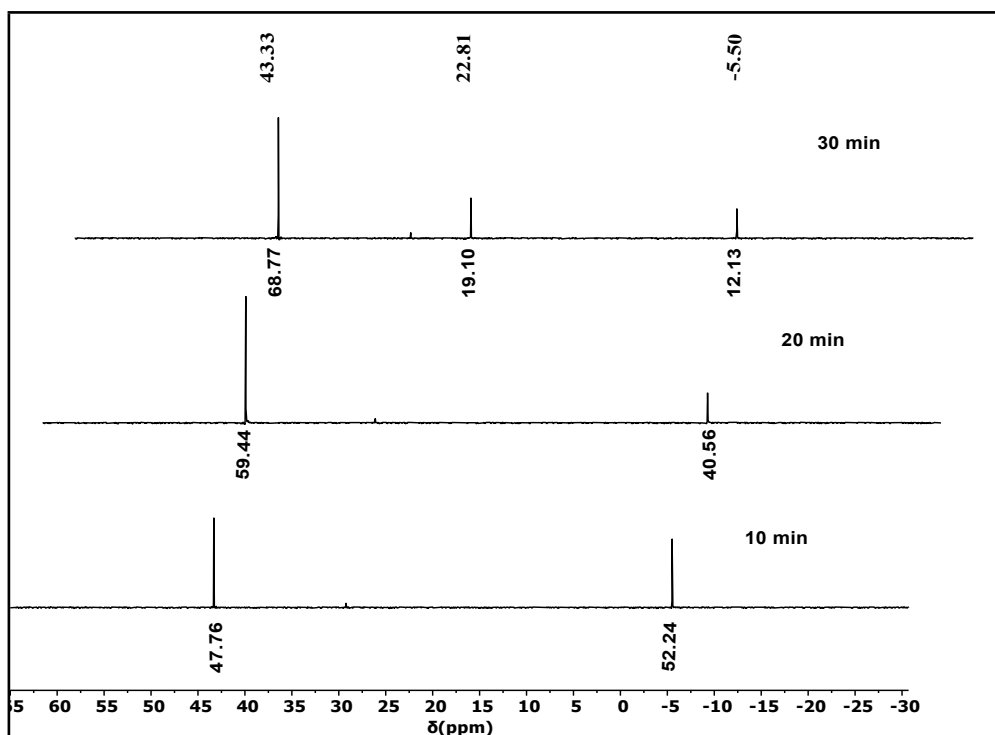

Figure S34:  $^{31}\text{P}\{^1\text{H}\}$  NMR spectral changes with time for the reaction of  $2^{\text{tBu}}$  with  $\text{Et}_4\text{NSH}$  (1:2 ratio) in  $\text{CDCl}_3$  at  $70^\circ\text{C}$ .

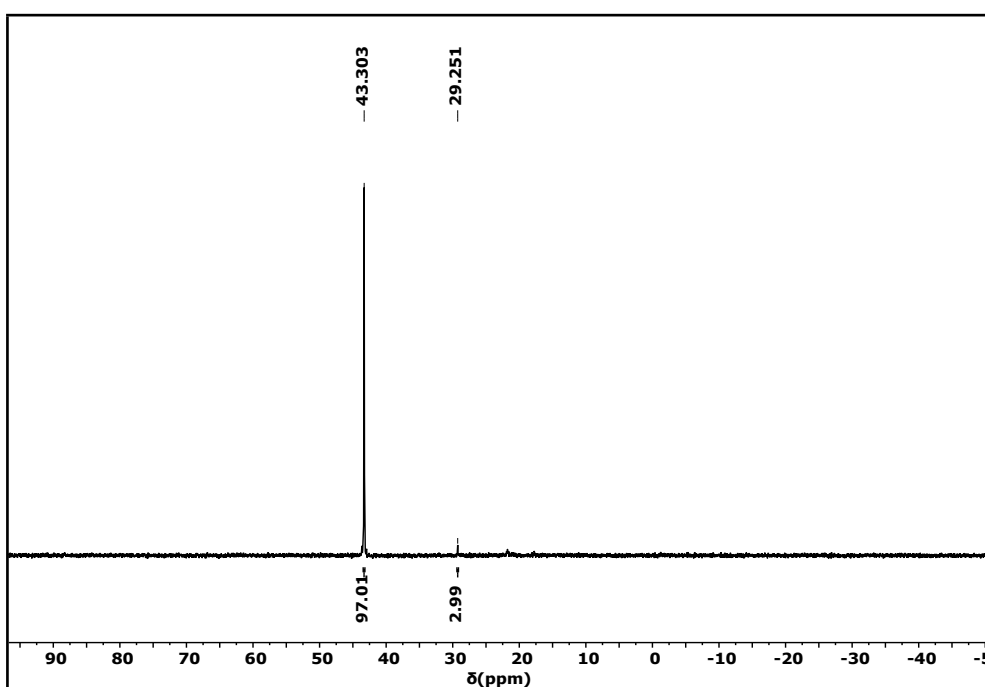

Figure S35.  $^{31}\text{P}\{^1\text{H}\}$  NMR spectral changes with time in  $\text{CDCl}_3$  for the reaction of  $\text{PPh}_3$  and  $\text{Et}_4\text{NSH}$  in presence of 10 mol % of complex  $2^{\text{tBu}}$  as catalyst at  $70^\circ\text{C}$  in  $\text{CDCl}_3$ .

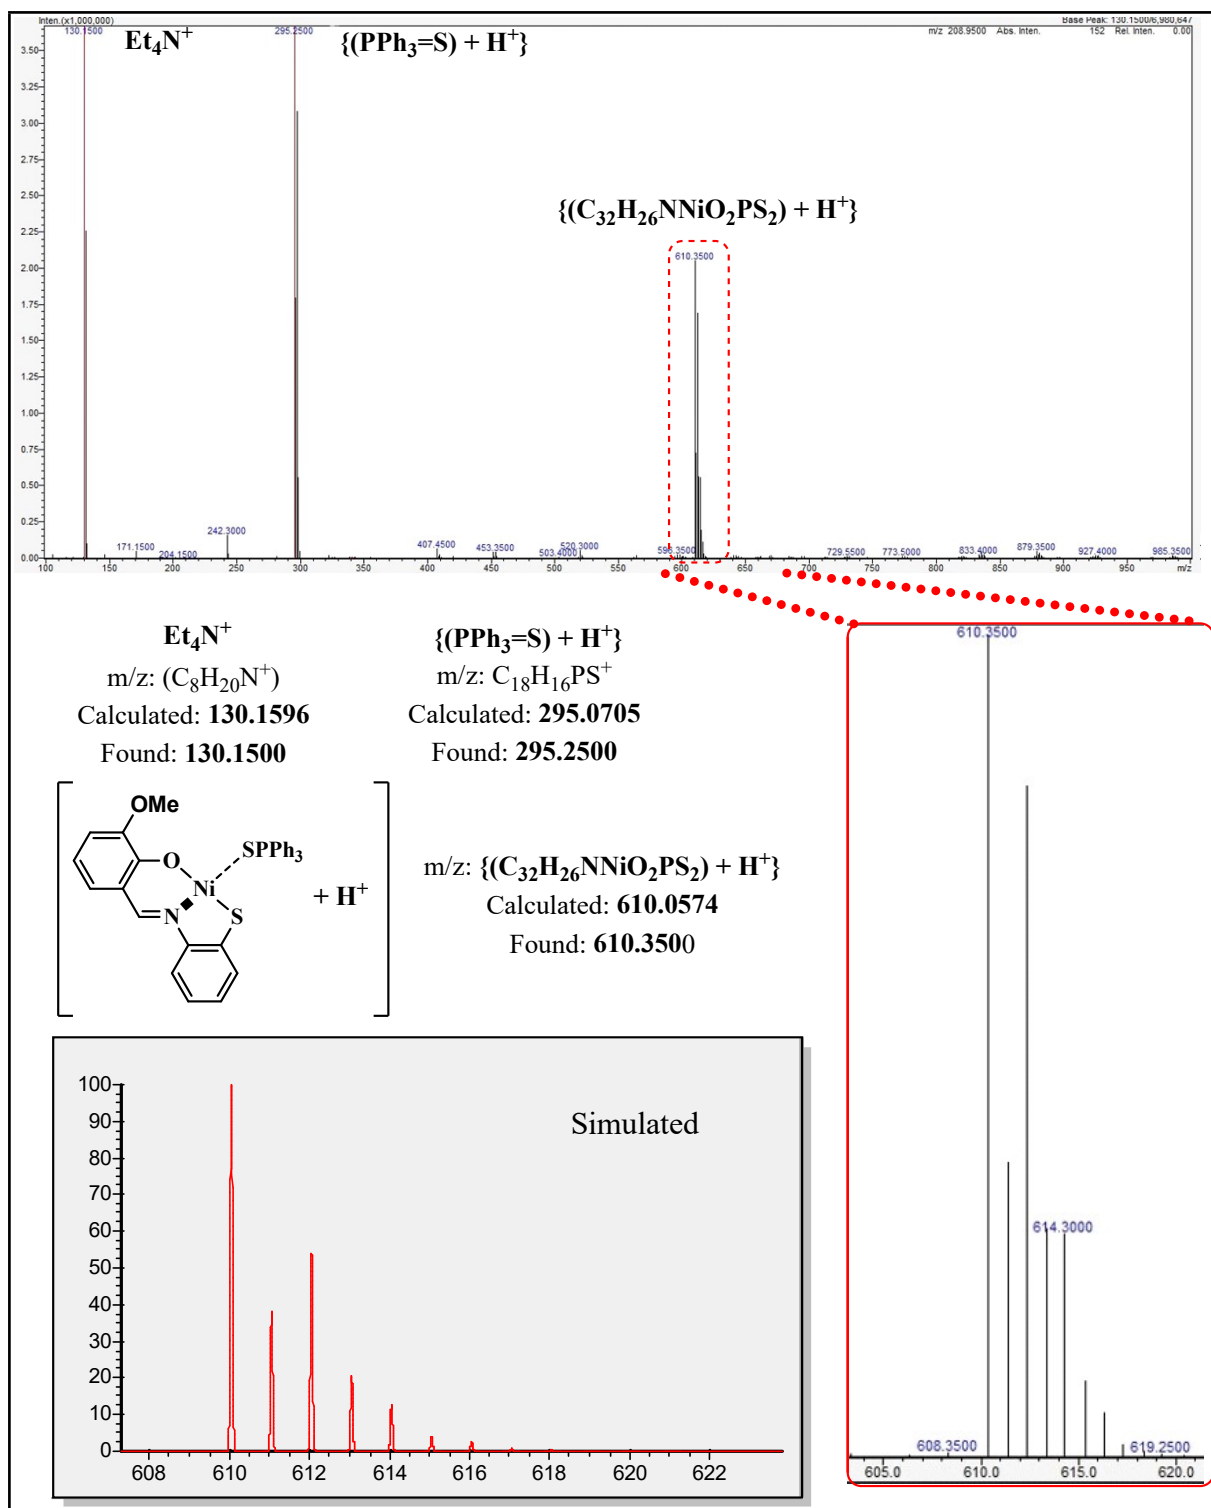

**Figure S36:** Mass spectra of the reaction mixture of 2<sup>OMe</sup> with Et<sub>4</sub>NSH (1:2 ratio) in acetonitrile along with simulated spectrum inset (using Isopro3.0 program).

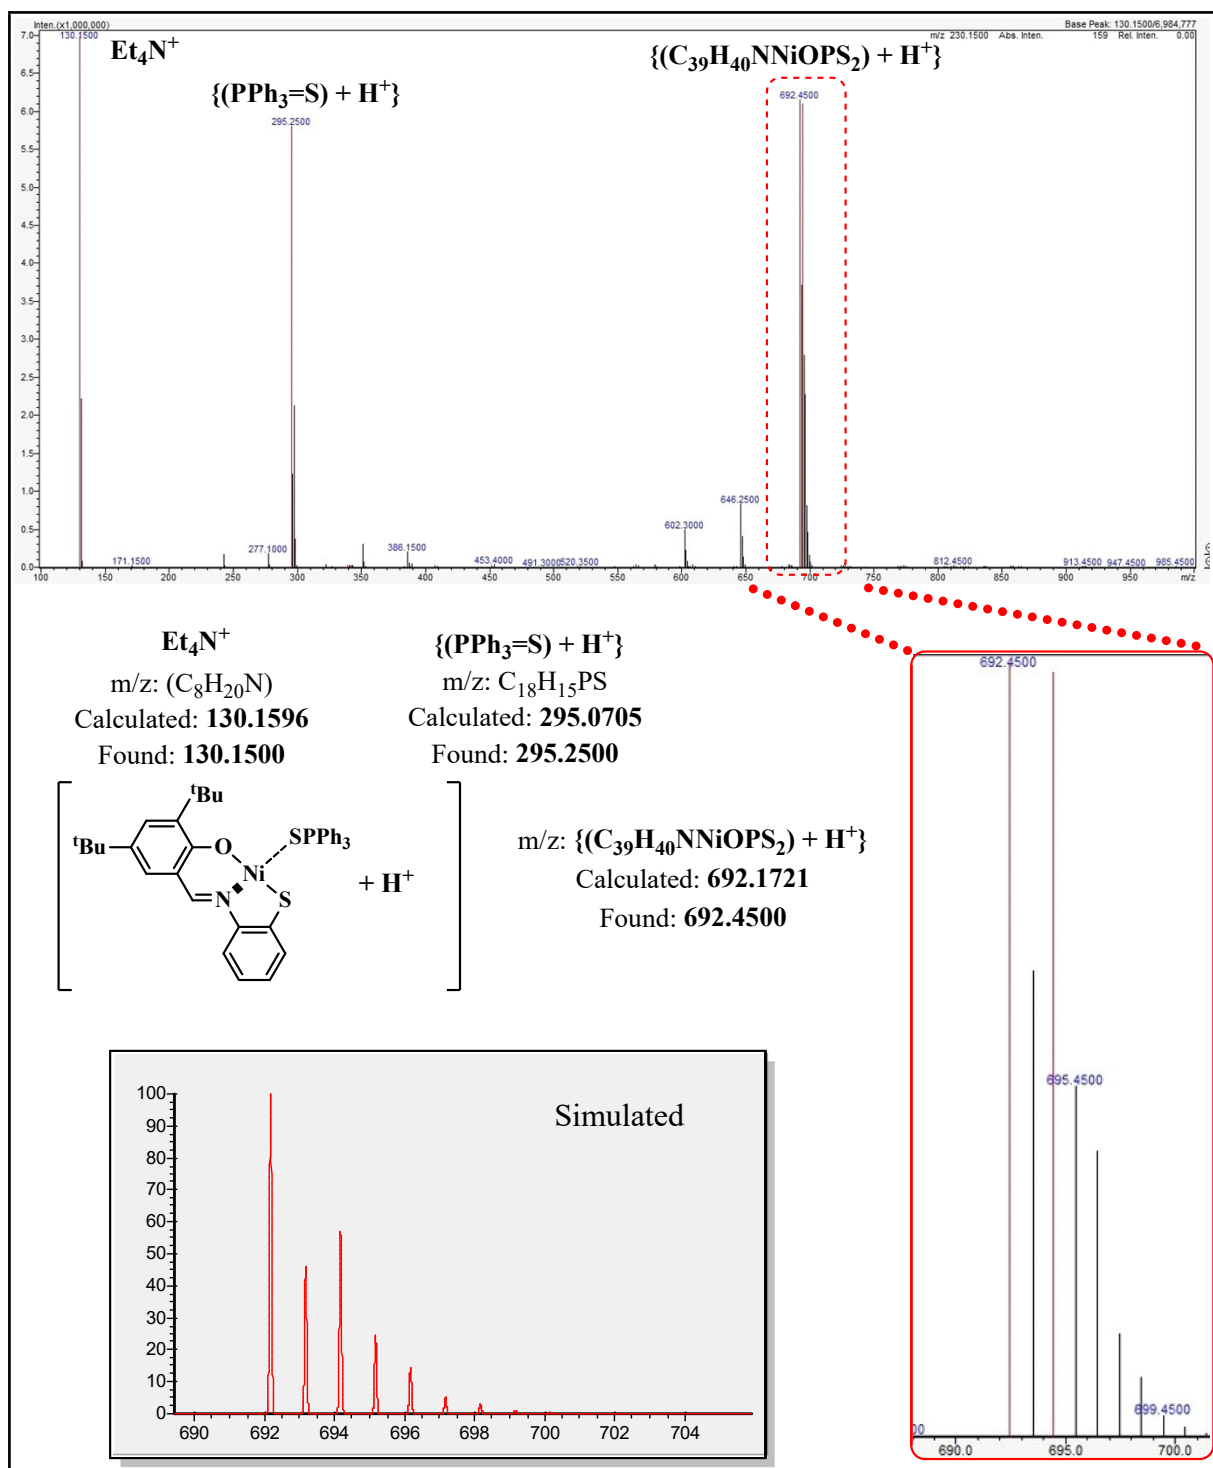

Figure S37: Mass spectra of the reaction mixture of 2<sup>tBu</sup> with Et<sub>4</sub>N<sub>4</sub>SH (1:2 ratio) in acetonitrile along with simulated spectrum inset (using Isopro3.0 program).

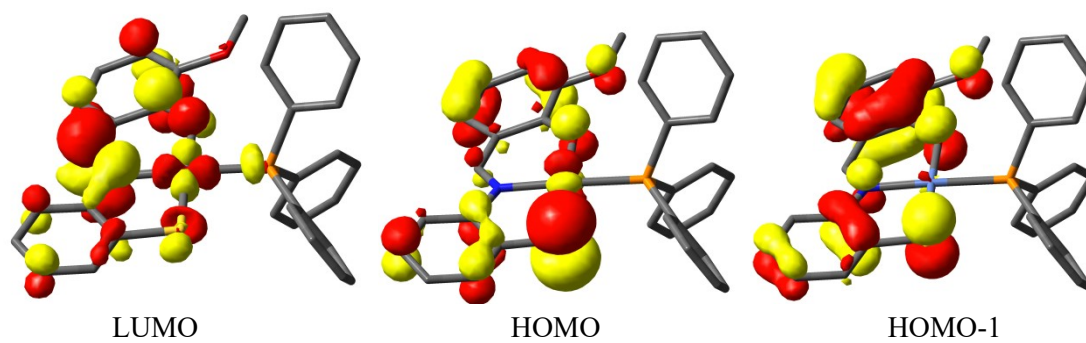

Figure S38: LUMO, HOMO and HOMO-1 of  $2^{\text{OMe}}$  (geometry optimization using B3LYP/6-311-G+\* in DFT method).





Crystallographic Data Parameters:

**Table S1.** Crystallographic parameters for Synthesis of  $[(\text{NiL}^{\text{tBu}})_2]$  (**1<sup>tBu</sup>**),  $[\text{NiL}^{\text{tBu}}(\text{PPh}_3)]$  (**2<sup>tBu</sup>**),  $[\text{NiL}^{\text{OMe}}(\text{SH})]$  (**3<sup>OMe</sup>**·(**Et<sub>4</sub>N**)),  $[\text{NiL}^{\text{tBu}}(\text{SH})]$  (**3<sup>tBu</sup>**·(**Et<sub>4</sub>N**))

| Compound                                    | <b>1<sup>tBu</sup></b>                                                                       | <b>2<sup>tBu</sup></b>                                              | <b>3<sup>OMe</sup></b> ·( <b>Et<sub>4</sub>N</b> )                             | <b>3<sup>tBu</sup></b> ·( <b>Et<sub>4</sub>N</b> )                  |
|---------------------------------------------|----------------------------------------------------------------------------------------------|---------------------------------------------------------------------|--------------------------------------------------------------------------------|---------------------------------------------------------------------|
| Identification code                         | 1tBu                                                                                         | 2tBu                                                                | 3OMe                                                                           | 3tBu                                                                |
| Empirical formula                           | C <sub>42</sub> H <sub>50</sub> N <sub>2</sub> Ni <sub>2</sub> O <sub>2</sub> S <sub>2</sub> | C <sub>39</sub> H <sub>40</sub> NNiOPS                              | C <sub>22</sub> H <sub>32</sub> N <sub>2</sub> NiO <sub>2</sub> S <sub>2</sub> | C <sub>29</sub> H <sub>46</sub> N <sub>2</sub> NiOS <sub>2</sub>    |
| Formula weight                              | 796.38                                                                                       | 660.46                                                              | 479.31                                                                         | 561.51                                                              |
| Temperature/K                               | 273.15                                                                                       | 101(1)                                                              | 115.0                                                                          | 100.0(2)                                                            |
| Crystal system                              | trigonal                                                                                     | orthorhombic                                                        | monoclinic                                                                     | trigonal                                                            |
| Space group                                 | R-3                                                                                          | Pca2 <sub>1</sub>                                                   | P2 <sub>1</sub> /c                                                             | R3c                                                                 |
| a/Å                                         | 21.803(6)                                                                                    | 19.25730(10)                                                        | 17.1809(5)                                                                     | 29.6327(3)                                                          |
| b/Å                                         | 21.803(6)                                                                                    | 13.21440(10)                                                        | 16.6895(4)                                                                     | 29.6327(3)                                                          |
| c/Å                                         | 50.500(10)                                                                                   | 13.09390(10)                                                        | 16.4020(4)                                                                     | 18.1052(2)                                                          |
| α/°                                         | 90                                                                                           | 90                                                                  | 90                                                                             | 90                                                                  |
| β/°                                         | 90                                                                                           | 90                                                                  | 102.0510(10)                                                                   | 90                                                                  |
| γ/°                                         | 120                                                                                          | 90                                                                  | 90                                                                             | 120                                                                 |
| Volume/Å <sup>3</sup>                       | 20789(12)                                                                                    | 3332.05(4)                                                          | 4599.5(2)                                                                      | 13768.2(3)                                                          |
| Z                                           | 18                                                                                           | 4                                                                   | 8                                                                              | 18                                                                  |
| ρ <sub>calc</sub> /g/cm <sup>3</sup>        | 1.145                                                                                        | 1.317                                                               | 1.384                                                                          | 1.219                                                               |
| μ/mm <sup>-1</sup>                          | 0.937                                                                                        | 2.115                                                               | 3.070                                                                          | 2.352                                                               |
| F(000)                                      | 7560.0                                                                                       | 1392.0                                                              | 2032.0                                                                         | 5436.0                                                              |
| Crystal size/mm <sup>3</sup>                | 0.25 × 0.18 × 0.12                                                                           | 0.21 × 0.14 × 0.12                                                  | 0.31 × 0.28 × 0.25                                                             | 0.25 × 0.2 × 0.12                                                   |
| Radiation                                   | MoKα<br>(λ = 0.71073)                                                                        | Cu Kα<br>(λ = 1.54184)                                              | CuKα<br>(λ = 1.54178)                                                          | Cu Kα<br>(λ = 1.54184)                                              |
| 2θ range for data collection/°              | 4.84 to 50.478                                                                               | 6.69 to 136.272                                                     | 7.466 to 133.362                                                               | 5.966 to 136.302                                                    |
| Index ranges                                | -25 ≤ h ≤ 26,<br>-26 ≤ k ≤ 25,<br>-59 ≤ l ≤ 60                                               | -23 ≤ h ≤ 23,<br>-15 ≤ k ≤ 15,<br>-15 ≤ l ≤ 15                      | -20 ≤ h ≤ 20,<br>-19 ≤ k ≤ 19,<br>-18 ≤ l ≤ 19                                 | -35 ≤ h ≤ 35,<br>-34 ≤ k ≤ 35,<br>-21 ≤ l ≤ 21                      |
| Reflections collected                       | 84259                                                                                        | 54454                                                               | 65578                                                                          | 38478                                                               |
| Independent reflections                     | 8307<br>[R <sub>int</sub> = 0.0816,<br>R <sub>sigma</sub> = 0.0377]                          | 5907<br>[R <sub>int</sub> = 0.0684,<br>R <sub>sigma</sub> = 0.0304] | 7939<br>[R <sub>int</sub> = 0.0902,<br>R <sub>sigma</sub> = 0.0484]            | 5518<br>[R <sub>int</sub> = 0.0500,<br>R <sub>sigma</sub> = 0.0309] |
| Data/restraints/parameters                  | 8307/6/422                                                                                   | 5907/1/403                                                          | 7939/0/598                                                                     | 5518/4/362                                                          |
| Goodness-of-fit on F <sup>2</sup>           | 1.058                                                                                        | 1.079                                                               | 1.091                                                                          | 1.037                                                               |
| Final R indexes [I ≥ 2σ (I)]                | R <sub>1</sub> = 0.0857,<br>wR <sub>2</sub> = 0.2122                                         | R <sub>1</sub> = 0.0338,<br>wR <sub>2</sub> = 0.0924                | R <sub>1</sub> = 0.0558,<br>wR <sub>2</sub> = 0.1153                           | R <sub>1</sub> = 0.0410,<br>wR <sub>2</sub> = 0.1093                |
| Final R indexes [all data]                  | R <sub>1</sub> = 0.1187,<br>wR <sub>2</sub> = 0.2425                                         | R <sub>1</sub> = 0.0344,<br>wR <sub>2</sub> = 0.0933                | R <sub>1</sub> = 0.0624,<br>wR <sub>2</sub> = 0.1191                           | R <sub>1</sub> = 0.0421,<br>wR <sub>2</sub> = 0.1106                |
| Largest diff. peak/hole / e Å <sup>-3</sup> | 1.15/-0.58                                                                                   | 0.21/-0.31                                                          | 0.38/-0.57                                                                     | 0.97/-0.28                                                          |
| Flack parameter                             | ----                                                                                         | -0.035(18)                                                          | ----                                                                           | 0.37(2)                                                             |
